# Supplementary material for: The Minimal Proteome in the Reduced Mitochondrion of the Parasitic Protist Giardia intestinalis
Source: PLoS One. 2011 Feb 24;6(2):e17285. doi: 10.1371/journal.pone.0017285 (PMC3044749; doi:10.1371/journal.pone.0017285)
Supplement: Figure S7 — Sequence alignment of Giardia Pam16 against eukaryotic Pam 16 orthologues and giardial Pam 18 paralogue. Conserved leucin in an interacting hydrofobic pocket is shown in green (D'Silva PR, Schilke B, Hayashi M, Craig EA (2008) Interaction of the J-protein heterodimer Pam18/Pam16 of the mitochondrial import motor with the translocon of the inner membrane. Mol Biol Cell 19:424-32). The typical HPD motif (in blue) present in Pam18 is degenerated in Pam16, in yellow (Mokranjac D, Bourenkov G, Hell K, Neupert W, Groll M (2006) Structure and function of Tim14 and Tim16, the J and J-like components of the mitochondrial protein import motor. EMBO J 25:4675-85). Giardia intestinalis Pam 16 GL50803_19230; Trichomonas vaginalis TVAG_470110; Toxoplasma gondii XP_002367323.1; Saccharomyces cerevisiae NP_012431.1; Neurospora crassa XP_960477.1; Pediculus humanus XP_002428010.1; Schistosoma japonicum CAX74438.1; Homo sapiens NP_057153.8; Mus musculus NP_079847.1; Xenopus laevis NP_001084733.1; Giardia intestinalis Pam 18 XP_002364144. (PDF) [file pone.0017285.s007.pdf]

**Fig. S7**

|               |                     |            |            |            |            |            |            |     |
|---------------|---------------------|------------|------------|------------|------------|------------|------------|-----|
| Giardia Pam16 | MLLPKAGVEIAKGLTAGVR | SSLSVLA--D | NIVESSLALA | DIWHHVRAEV | RSL---AKAP | NWAKVRIAPM | 64         |     |
| Trichomonas   | MVIVELAGLVI         | SSTKVVC--S | TFINGFKHAA | AA-NAPNGNA | FQK---FAGA | VFGIQFQTRM | 55         |     |
| Saccharomyces | MAHRAFIQVII         | TGTQVFG--K | AFAEAYRQAA | SQ---SVKQG | ATNASRR--- | GTGKGEYGGI | 53         |     |
| Neurospora    | MAYRLITQVVV         | VGSRVLG--R | AFAEAYKQAA | AS-SQYQRAQ | QKNGNAA--- | TGRASLTSGM | 55         |     |
| Pediculus     | MAK-YVAQIII         | VGAQVIG--K | AFARAVRQEL | NA-SREAARR | -GGGGKTGAK | RAQENIRSGI | 56         |     |
| Schistosoma   | MAK-YFVQLVI         | SGARVLG--R | AFAQAVKEEY | AS-SQRVADA | RRNSTSSGSE | QNTYVQNAGI | 57         |     |
| Homo          | MAK-YLAQIIV         | MGVQVVG--R | AFARALRQEF | AA-SRAAADA | RGR---AGHR | SAAASNLSGL | 54         |     |
| Mus           | MAK-YLAQIIV         | MGVQVVG--R | AFARALRQEF | AA-SQAAADA | RGR---AGHQ | SAAASNLSGL | 54         |     |
| Xenopus       | MAK-YLAQIVV         | MGMQVVG--R | AFTRALRQEF | AA-SKVAAEA | RGR---AGTE | SAAVSSLSGI | 54         |     |
| Giardia Pam18 | MLR-VLSENRF         | PLSLVAGVVA | GFYSYLRKDP | RV-IVTSFP- | RSW----K-- | --GGEISSPL | 50         |     |
| Giardia Pam16 | PLSQASQILD          | IESD-----T | SLDKIRAQRD | KL---LGQL  | SLSPFIQVKV | NEAYERIKKS | KCGRYAHRRE | 125 |
| Trichomonas   | MPDEARQILG          | FEQKD---KL | DIKSIKEHLD | RMIKLNDLEK | GGSPYINERF | IAASHVLAK  |            | 111 |
| Saccharomyces | TLDESCKILN          | IEESKG--DL | NMDKINNRFN | YLFEVNDKEK | GGSFYIQSKV | YRAAERLKWE | LAQREKNAKA | 121 |
| Neurospora    | TLDEACKILN          | VNKPADGTAA | NMEEVMERFK | RLFDANDPEK | GGSFYIQSKV | VRARERLEAE | IKPKMEEKQA | 125 |
| Pediculus     | TLEEAQQILN          | VSKM-----  | DPVEIKEKYE | HLFNANDKTK | GGSFYIQSKV | VRAKERLEQE | LENMKSEKHK | 120 |
| Schistosoma   | SLDEAQIILN          | VKDIH----- | DSSTLNKQFE | HLFSSNSKDK | GGSFYIQSKV | FRAKERIDEE | LQFEKSERRR | 122 |
| Homo          | SLQEAQQILN          | VSKL-----  | SPEEVQKNYE | HLFKVNDKSV | GGSFYIQSKV | VRAKERLDEE | LKIQAQEDRE | 118 |
| Mus           | SLQEAQQILN          | VSKL-----  | SPEEVQKNYE | HLFKVNDKSV | GGSFYIQSKV | VRAKERLDEE | LRIQAQEDRE | 118 |
| Xenopus       | SLQEAQQILN          | VSKL-----  | TPEEIQKNYE | HLFKVNDKGL | GGSFYIQSKV | VRAKERLDQE | MEIQSKTHKP | 118 |
| Giardia Pam18 | SSHEARLVLN          | TSRFS----- | TDAEVTKNYR | SLLAKAHPDR | GGSKYIAAII | GEAHEKLRNR | C          | 106 |
| Giardia Pam16 | SRRERCRESK          | IQILNKNI   |            |            |            |            |            | 143 |
| Trichomonas   |                     |            |            |            |            |            |            | 111 |
| Saccharomyces | KAGDASTAKP          | PPNSTNSSGA | DNSASSNQ   |            |            |            |            | 149 |
| Neurospora    | EEEVKEGW            | NPKIYKDR   |            |            |            |            |            | 141 |
| Pediculus     | MSQQDRKQN           | EKCFNIRF   |            |            |            |            |            | 137 |
| Schistosoma   | NPGSENRQSRT         |            |            |            |            |            |            | 133 |
| Homo          | KGQMPHT             |            |            |            |            |            |            | 125 |
| Mus           | KGQKPKT             |            |            |            |            |            |            | 125 |
| Xenopus       | KEETTQT             |            |            |            |            |            |            | 125 |
| Giardia Pam18 |                     |            |            |            |            |            |            | 106 |
