# Supplementary material for: The Minimal Proteome in the Reduced Mitochondrion of the Parasitic Protist Giardia intestinalis
Source: PubMed Central journal article supplement (PMC3044749; doi:10.1371/journal.pone.0017285), 2011-02-24
Supplement: pone.0017285.s002.pdf [file pone.0017285.s002.pdf]

**Fig. S2**

|               |                                                                                 |                                                                   |                    |               |          |     |
|---------------|---------------------------------------------------------------------------------|-------------------------------------------------------------------|--------------------|---------------|----------|-----|
| Giardia       |                                                                                 | MLPALITPLVRSITKNGIKITDAAVSSLRNLIK----PSEFLRVNVMTSGCAGLTYK         | 53                 |               |          |     |
| Trichomonas   |                                                                                 | MLSQFFSNFAQKKAASFMTPAAIKQIKELLKTD--FENKMLRITLKSGGCAGFQYD          | 54                 |               |          |     |
| Trypanosoma   |                                                                                 | MLRRSYLLFCVPHLSAVYGRSFTVSSRVVHRINEKNGEEGFQNDQRFRLRLAVDSGGCHGYKYH  | 63                 |               |          |     |
| Saccharomyces | MQAKLLFTRLNFRRPSTTLRQFPLTCLFHSKAFYSDLVTKEPLITPKRI INKTPGLNLSISERASNRLAEIYRNS--- | KENLRISVESGGCHGFQYN                                               | 95                 |               |          |     |
| Homo          | MAAAWGSSSLTAATQRAVTFWPRGRLLTASLGPQARREASSSSPEAGEGQIRLTDSCVQRLLLEITE----         | GSEFLRLQVEGGGCSGFQYK                                              | 85                 |               |          |     |
| Arabidopsis   |                                                                                 | MKASQILAAAAARVGPALRKQVLTTLTDEAASRVHLLQQRQKP-F-LRLGVKARGCNGLSYT    | 60                 |               |          |     |
| Chlamydomonas |                                                                                 | MKSTLGLLAEALKETARSPRMRKAAVELTEAAAGRIKELLNKRHKE-Y-LKLGVKTRGCSGMSYT | 63                 |               |          |     |
| Rickettsia    |                                                                                 | MKNVISLTDSSAAKQIKLLIEKRAKPTFGIRVGVKSGGCAGQTYT                     | 44                 |               |          |     |
| Escherichia   |                                                                                 | MSITLSDSAAARVNTFLANRKGK-FGLRLGVRTSGCSGMAYV                        | 41                 |               |          |     |
| Mycobacterium |                                                                                 | MAVQNELSAKTHGVILTVAATKAKSLLDQEGRDDLALRIAVQPGGCAGLRYN              | 53                 |               |          |     |
| Giardia       | FAVDTD---RRKDDD----VTKKGVE-----LRVDNKALAYVKGSTIDFISEPFRQYFVLKD-NPQSSGS          | CS                                                                | CGESFEIPGLDIVPTPCH | 131           |          |     |
| Trichomonas   | FSFDSA---ARKGDH---LFQQDGAA-----VVLDDKALLYLRGAELDYSSDIFSSYFKVNI                  | PLESELHSC                                                         | CGKSVGTDET         | VGKHKCSH      | 133      |     |
| Trypanosoma   | FSFEENSALVPEEDV---VVAETDVLPGAEGRSGVEPPRVVDRHSLTKLQAAVIDFHSELKGA                 | AFVVG-NELVDES                                                     | CAC                | AMSFSIKKRQPQK | 155      |     |
| Saccharomyces | LTLEPATKPKDINKDVKDFSDDLLDDDDSKDIIYVLPEDKGRVIIDSKSLNILLNNTTLTYT                  | NELIGSSFKIIN--                                                    | GSLKSS             | CG            | GSSFDIEN | 185 |
| Homo          | FSLDTV---INPDDR---VFEQGGAR-----VVVDSDSLAFVKGAVDFSQELIRSS                        | FQVLN-NPQAQQG                                                     | CS                 | CGSSFSIKL     | 154      |     |
| Arabidopsis   | LNYADE---KGKFDE---LVEEKGVR-----ILVEPKALMHVIGTKMDFVDDKLRSE                       | FVFI--NPNSQG                                                      | CG                 | GESFMTTST     | SSAKQSAS | 137 |
| Chlamydomonas | LNYADN---KGKFDE---VVEDKGVR-----IIIEPQALMHVLGTMKDYVKDDL                          | RQEFV--NPNAKGT                                                    | CG                 | GESFTT        | 129      |     |
| Rickettsia    | VEYADS---KNQFDE---VVEEKGVR-----ILIDPKALMYILGSEMDYVETKPKSQ                       | FTFT--NPNEKAS                                                     | CG                 | GKSFV         | 110      |     |
| Escherichia   | LEFVDE---PTPEDI---VFEDKGVK-----VVVDGKSLQFLDGTQLDFVKEGL                          | NEGFKFT--NPNVKDE                                                  | CG                 | GESFHV        | 107      |     |
| Mycobacterium | LFFDDR---TLDGDL---TAEFGGVT-----LTVDRMSAPYVEGASIDFVDTIEKQ                        | GFTID--NPNANGS                                                    | CAC                | GDSFN         | 118      |     |
