# Supplementary material for: The Minimal Proteome in the Reduced Mitochondrion of the Parasitic Protist Giardia intestinalis
Source: PubMed Central journal article supplement (PMC3044749; doi:10.1371/journal.pone.0017285), 2011-02-24
Supplement: pone.0017285.s004.pdf [file pone.0017285.s004.pdf]

Fig S4

**Giardia** -----MALSALSPSSMAGTSVLMRLMRGLVKPSSSTIEQQIKL 38  
**Homo** -----MAAQCVRLARRSLPALALSRLRSPRLCTATKQKNSGQNL EEDMQ--SEQKADPPATEKTLLEEKVKLEEQLKETVEKYKR 80  
**Saccharomyces** MRAFSAAATVRATTRKSFIPMAPRTPFFVTPSFTKNVGSRRMRMFYSDEAKSEESKENNEDLTEEQSEIKKLESQLSAKTKEASELKDRLLR 90  
**Escherichia** -----MSSKEQKTPEGQAPEEIMDQHEEIEAVEPEASAEQVDPDEKVANLEAQLAEAQTRE---RDGILR 64  
**Trichomonas** -----MLSSQQYLPSTLFFVRTFVEKAAESAKQATEKAVANDKKPEEKPKPTIQELEAQIKDIRNRNLF 62  
**Trypanosoma** -----MRALTFRSSLCAGRTAVGAMCFGRLLWASSTSATEGSEKQNVTEDESETVSVAPVSPAYAKLEKELSDAKERIAELKKEVLY 81  
**Dictyostelium** -----MNSLIRRGLVSI RTSTVIKPSFGLMRNRFYSTENNQEAAK--PEETENKPAPG-SLEETIEKLKEELEETKKQLLY 75  
**Bacillus** -----MSEEKQTV EQNETEEQEIIEEQAAAEQQEETNESELLQNQINELQGLLEEKENKLLR 58  
**Halobacterium** ---MSDHAHAADAADTDAPEGDDAGDDGEGQAGDDGTSALSERVRLADADNADALADDVAAL EARVETLTDELADAEDVADLTERVQT 87

**Giardia** LLAERQSAAEQAQADAVAEARIEATQRCLRELLKILDAVDGLHAQAKSHPKSRGALTKHLHEIQESI AATHSLADQVLDTL EAQRIAPNRL 128  
**Homo** ALADTENLRQRSQKLV EEA KLYCIQAFCKDLLEVADVLEKATQCVPK--EEIKDDNPHLKNLYEGLVMTVEVQIQKVFTHG LLLKLN-PVG 167  
**Saccharomyces** SVADFRNLQVTKKDIQKAKDFALQKFAKDLLESVDNFGHALNAFKE--EDL-QKSKEISDLYTGVRMTRDVFENTLRKHGIEKLD-PLG 176  
**Escherichia** VKAEMENLRRTTELDIEKAHKFALEKFINELLPVIDS LDRALEVADK-----ANPDMSAMVEGIELTLKSM LDVVRKFGVEVIA-ETN 146  
**Trichomonas** LLAEVENARRRRFARLEVEMETYAVSKLAKDLLPVADNMGR IINSGAK-----QNVKD VIEAVKLVDAEFHNIFKRFKIEKIV-SKG 142  
**Trypanosoma** RAADAENARRIGSEDTVTKAKAYCITSGKMDLDVVDTLERGLEAITKLPQAEVEGHKTLSSIHGTGKLSLKL LNNLAKHGIEKLDVAVG 171  
**Dictyostelium** TAADRENVRFAKEDNEKAKKFGIQSFTKELLEVV DQLEMATNLFPK--EKL-DENKELKDLHEGVKMT EQFLFKIMGNQGLQRFN-PIG 161  
**Bacillus** VQADFENYKRRSRLEMEASQKYRSQNI VTDLLPALDSFERALQVEAD-----NEQTKSLLQGMEMVHRQLVEALKKEGVEAIE-AVG 139  
**Halobacterium** KQADFKNYKERAKRKQEEIRERATEDLVERLLDVRDNLDRALDQEESE-----ESDEDGIREGVELTRDEFDRVLETEGVTEIRPEPG 169

**Giardia** DMFDSLHN AVRVIEDSSLPS-NTVCETIQPGLLHKGIVIRPAQVVINDIY-- 178  
**Homo** AKFDFEYEHEALFHTPVEGKEP-GTVALVSKVGYKLHGRTLREALVGVVKEA-- 217  
**Saccharomyces** EPFDENKHEATFELPQPDKEP-GTVFHVQQLGFTLNDRVIRPAKVGIVKGEEN 228  
**Escherichia** VPLDENVHQAIAMVESDDVAP-GNVLGINQKGYTLNGRTIRAAAMVTAKAKA- 197  
**Trichomonas** QKFDQYHDAIQMIDTRGSAPSGTIIDCTTEGYKIDKLLRAAKVIVAK---- 191  
**Trypanosoma** AKFDENFHDALLKVPPTAEAPPGHISTVKTGYKIQDRVLRASQVGVASDD-- 222  
**Dictyostelium** EKFDENNHAI F E LNDPTKEN-NTVGHVVKQGYKLHDLVRPAMVGVN KIKPQ 213  
**Bacillus** QEFDENLHQAVMQAEDENYGS-NIVVEENQKGYKLD RVIRPSMVKVNQ---- 187  
**Halobacterium** DSVDAARHEVMMRVDS--QPAGTIVDVIRPGYEMSGVVRAAQVTVSEE--- 217
