# Supplementary material for: The Minimal Proteome in the Reduced Mitochondrion of the Parasitic Protist Giardia intestinalis
Source: PubMed Central journal article supplement (PMC3044749; doi:10.1371/journal.pone.0017285), 2011-02-24
Supplement: pone.0017285.s005.pdf [file pone.0017285.s005.pdf]

**Fig. S5**

**Flavodoxin-like FMN domain**

|                     |                                                               |    |
|---------------------|---------------------------------------------------------------|----|
| G.intestinalis OR-1 | -----MALSIIVYATVGGTARNLAHKIAA-----LLDSRGIATQLYDVKNIR-TLEDLPT  | 48 |
| G.intestinalis OR-2 | MTRSNEKPIITVMYASATGTIQRLADQLVG-----DLCAREASVSSINMKAFAPYNI PRG | 55 |
| S.cerevisiae Tah18  | --MSSSKKIVILYGSETGNAHDFATILSH-----RLHRWHFSHTFCSIGDY-DPQDILKC  | 52 |
| H.sapiens NDOR      | ---MPSPQLLVLFGSQTGTAQDVSERLGR-----EARRRRLGCRVQALDSY-PVVNLINE  | 51 |
| R.norvegicus NOS    | -----RVRATVLFATETGKSEALARDLAA-----LFSYAFNTKVVCMEOY-KANTLEEE   | 48 |
| R.norvegicus CPR    | -----GRNIIVIFYGSGTGAEEFANRLSKDAHRYGMRGMSADPEEYDLADL-SSLPEIDK  | 54 |
| E.coli SiR          | -----MPGITIIISASQTGNARRVAEALRD-----DLAALKLVNKLVNAGDY-KFKQIASE | 49 |
| H.sapiens MSR       | -----MRRFLLLYATQQGQAKAIAEEICE-----QAVVHGFSAIDLHCISESDKYDLKTET | 50 |
| T.vaginalis Hyd     | -----TSLPIVAFGSSSGTASRLARIFAS-----YFNTLPVQLNMVTMQTL-----KS    | 43 |
| E.coli flavodoxin   | -----MAITGIIFFGSDTGNTENIAKMIQK-----QLGKDVADVHDIKSSKED-LEAYD   | 48 |

|                     |                                                                |     |
|---------------------|----------------------------------------------------------------|-----|
| G.intestinalis OR-1 | GDLLYLTSITHGLGQHPQSAHALMKSLKQQSKPGPRHWLNKREANP-QLLGSSRRIAVLGI  | 107 |
| G.intestinalis OR-2 | TIIYMTC-TFFAGEHPPASKE-----FIAWLQTVNPSLR--PFRDIRFAVFGM          | 100 |
| S.cerevisiae Tah18  | RYLFIIICSTITGQGELPRNVNALKGE----RPVTFWSFLKRKNLPSN--LLNHIQTAMLGL | 106 |
| H.sapiens NDOR      | PLVIFVCATITGQGDPPDNMKN-----FWRFI FRKNLPS--TALCQMDFAVLGL        | 97  |
| R.norvegicus NOS    | QLLLIVVTSITFGNGDCPSNGQT-----LKKSLFMMKELG-----HTFRYAVFGL        | 91  |
| R.norvegicus CPR    | SLVVFCMATYEGEDPTDNAQD-----FYDWLQETDVD-----LTGVKFAVFGM          | 97  |
| E.coli SiR          | KLLIVVTSITQEGEPPEEAVA-----LHKFLFSKASK-----LNTAFVAVFSL          | 93  |
| H.sapiens MSR       | APLVVVVSTITGTGDPDPTARKFVK--EIQNQTLPVDFFA-----HLRYGLLGL         | 96  |
| T.vaginalis Hyd     | SQIIIFCSTIFGDGEFPNNAQK-----FVEMLSDSN-----EDLSHLSYGICAL         | 86  |
| E.coli flavodoxin   | -ILLLGIPTWYYGEOCDWDD-----FFPTLEE-----IDFNGKLVALFGC             | 88  |

|                     |                                                               |     |
|---------------------|---------------------------------------------------------------|-----|
| G.intestinalis OR-1 | GSI--KYHQFCAASQDAVA---VFKSHSIPTLVPEPIHLDTSELETG-----LQLWVKK   | 155 |
| G.intestinalis OR-2 | GSK--NYTTFCAASKNADKSII-FGG---TRILDALHLDRDEFKSDDSA---YIHWKKD   | 150 |
| S.cerevisiae Tah18  | GDS--SYPKENYGIKRLHQRIVTQLGA-NELFDRLEADDQAMAGSNKGTGL-GIESVYFE  | 162 |
| H.sapiens NDOR      | GDS--SYAKENFVAKKLHRRLL-QLGG-SALLPVCLGDDQHELGPDA-----VDPWLRD   | 148 |
| R.norvegicus NOS    | GSS--MYPQFCFAFAHDIDQKLSH-LGA-SQLAPT--GEGDELSGQEDA-----FRSWAVQ | 140 |
| R.norvegicus CPR    | GNK--TYEHFNAMGKYVDQRL-EQLGA--QRIFELGLGDDDG-NLEED-----FITWREQ  | 146 |
| E.coli SiR          | GDS--SYEFFCQSGKDFDSKLAELGG--ERLLDR-VDAD---VEYQAA---ASEWRAR    | 140 |
| H.sapiens MSR       | GDS--EYTYFCNGGKIIDKRLQE-LGA--RHFYDTGHADDCVG---LELV---VEPWIAQ  | 145 |
| T.vaginalis Hyd     | GSK--DYQKYCFEGHQLDKLQVQHK--SKRLIEMVELDSS-SPDHGECLF---ELWAAK   | 137 |
| E.coli flavodoxin   | GDQEDYAEYFCDALGTIRDIIEPRGATIVGHWPTAGYHFEASKGLADDDHFVGLAIDEDR  | 148 |

|                     |                                                                |     |
|---------------------|----------------------------------------------------------------|-----|
| G.intestinalis OR-1 | FLTAIGTTDS-----HVLDPVVRKLGEE-----NLADL                         | 183 |
| G.intestinalis OR-2 | LFKVLGLSEQPVISTN-----KIIVTKNTSLPDK-----WVCDV                   | 184 |
| S.cerevisiae Tah18  | YEKKVLSFLLSKYPNRKVNGQIIKREELDPEVYLEPASYLQLSDEHANEFKFT--STKVIF  | 220 |
| H.sapiens NDOR      | LWDRVLGLYPPPPGLTEIPPGVPLPSKFT---LLFLQEA PSTGSEGQ RVAHP--GSQPEP | 203 |
| R.norvegicus NOS    | TFRAACETFDVRSKHCIQIPKRYTSNATWE---PEQYKLTQSPESLDLN---KALSSI     | 192 |
| R.norvegicus CPR    | FWPAVCEFFGVEATGEESSIRQYELVVH---EDMDVAKVY--TGEMGRLKSYEN-QKPPF   | 200 |
| E.coli SiR          | VVDALKSRAPVAAPS-----QSVATGTVNE-----IHTSPY                      | 171 |
| H.sapiens MSR       | LWPALRKHFRSSRQEEISGALPVASPASSRTDLVKSELLHIESQVELLRFDSDGRK DSE   | 205 |
| T.vaginalis Hyd     | CGTMLGFKMPDLAIS-----TNYTVKVSKNPDD-----IIHKEKEQPLG              | 176 |
| E.coli flavodoxin   | QPELTAERVEKWKQISEELHLDEILNA-----                               | 176 |

|                     |                                                            |     |
|---------------------|------------------------------------------------------------|-----|
| G.intestinalis OR-1 | -SENTLFDPRITESTLLSATMLSSFGWIYHLHVPSTL-----                 | 219 |
| G.intestinalis OR-2 | SPLG-YKRGIMSKVKVLSDGKVDGVVHLYEITPCPM-----                  | 219 |
| S.cerevisiae Tah18  | EGDESLKVGRVNIKRIITSEGHFQDVRQFKFSNVVDKI-----                | 257 |
| H.sapiens NDOR      | SESK-PFLAPMISNQRVTGPSHFQDVRRLIEFDILGS-----                 | 238 |
| R.norvegicus NOS    | HAKN-VFTMRLKSLQNLQSEKSSRTLLVQLTFEGSR-----                  | 228 |
| R.norvegicus CPR    | DAKN-PFLAAVTANRKLNQG-TERHLMHLELDISDS-K-----                | 235 |
| E.coli SiR          | SKDA-PLVASLSVNQKITGRNSEKDVRHIEIDLGDS-----                  | 206 |
| H.sapiens MSR       | VLK---QNAVNSNQSNVVIDEFESSLTRSVPLSQASLNIPGLPPEYLQVHLQESLGQE | 261 |
| T.vaginalis Hyd     | YEY-----GILVTSQVITP-EGFEPKMHKYQIKLPP-----                  | 206 |

G.intestinalis OR-1 -----SPMLVPGAHIIVYPRIEE 237  
 G.intestinalis OR-2 -----KYEAGGHCAILPRNRA 235  
 S.cerevisiae Tah18 -----QENYEPGDTVTTIYPCNTD 275  
 H.sapiens NDOR -----GISFAAGDVVLIQPSNSA 256  
 R.norvegicus NOS -----GPSYLPGEHLGIFPGNQT 246  
 R.norvegicus CPR -----IRYESGDHVAVYPANDS 252  
 E.coli SiR -----GLRYQPGDALGVWYQNDP 224  
 H.sapiens MSR ESQVSVTSADPVFQVPISKAVQLTTNDAIKTLLLEVELDISNTDFSYQPGDAFSVICPNSD 321  
 T.vaginalis Hyd -----GVIIYQTGDLVGLPENDE 224

G.intestinalis OR-1 SMINRLLDLGVLTLHDTSIDSTAFIQIDSP--HDPDLPAD-----PISIVDLLSRV 286  
 G.intestinalis OR-2 EDIKALLAK-GHISLDHGCKVVAEASDIVVVEHASWVRSAVNAVLPLGRPIYVLDLLSQY 294  
 S.cerevisiae Tah18 EDVSRFLAN-QSHWLEIADKPLNFTSG----VPNDLKDGGGL-----VRPMTLRNLLKYH 324  
 H.sapiens NDOR AHVQRFCQV-LGLDPD-QLFMLQPRE-----PDVSSPTRL-----PQPCSMRHLVSHY 302  
 R.norvegicus NOS GLVQGILER-VVDCSS-PDQTVCLEVLDES--GSYWVKDKR-----LPPCSLRQALTYF 296  
 R.norvegicus CPR ALVNQIGEI-LGADLD-VIMSLNN-LD----EESNKKHPF-----PCPTTYRTALTY 298  
 E.coli SiR ALVKELVEL-LWLKGD-EPVTVG-----KTLPLNEALQWH 258  
 H.sapiens MSR SEVQSLQR-LQLEDK-REHCVLLKIKADTKKKGATLP-----QHIPAGCSLQFIFTWC 373  
 T.vaginalis Hyd DAVKAVLDE-LKLPD-DIITVSSMP-----EGYNIIPRVTMQLFSQY 268

**FAD binding pocket**

G.intestinalis OR-1 CNVNAKPSYNLISFLAPYATTSE-----DKFKLKYLTEDAVLFD-----ILSY 329  
 G.intestinalis OR-2 LDFSTVIDFTSFKELVPYVTDGAQ-----YRQALHMLEDPTLFKTVF-----LD 338  
 S.cerevisiae Tah18 CDFMSIPRTSFFLKIWTFATDVTKMERGQEQLNDQREKLRQFATDQDMQDLYDY---CNR 381  
 H.sapiens NDOR LDIASVPRRSFFELLACLSLHEL-----EREKLLFSSAQQEELFEY---CNR 348  
 R.norvegicus NOS LDITTPPTQLQLHKLARFATEET-----HRQRLEALCQPSEYNDWK-----FS 339  
 R.norvegicus CPR LDITNPPRTNVLYELAQYASEPS-----EQEHLHKMASSSGEGKE-LYLSWVVE 346  
 E.coli SiR FELTVNTANIVENYATLTR-----SETLLPLVGDKAKLQH-----YA 295  
 H.sapiens MSR LEIRAI PKKAFLRALVDYTSDSA EKRRQLQELCSKQGAADYSRFVVDACA----- 422  
 T.vaginalis Hyd LDLNGI PSRNLLRAFRQFCDDQFAVERLDRLNPSDSRLFDEFVKDISISEFILEYSR-- 326  
 L.interrogans FRN MHSMLKPTREPQINLFKKSNPYKAKVISNVLLTPETGTGKRPKKEGEALVHRIVLAIDHS 60

G.intestinalis OR-1 QWPTIYDFLLDFS--SLRIPLGKFLRVCPRIDPRLYSVASLPHPD-EDSNTVCTVDLLVG 386  
 G.intestinalis OR-2 TRLNMI DIFTKFS--SLKVPIHTLIEHMPAMTHRMYSIASAPSYVGETRLQFIVSDVDFE 396  
 S.cerevisiae Tah18 PRRSILEVLEDFI--SVKLPWKYVLDYLP I IKPRYYSISSG-PGD-PN-IELTVAIVKYK 436  
 H.sapiens NDOR PRRTILEVLCDFPHTAAAI PPDYLLDLIPVIRPRAFSIASSLLTH-PSRLQILVAVVQFQ 407  
 R.norvegicus NOS NNPTFLEVLEEF--SLRVPAAFLLSQLPILKPRYYSISSSLDHT-PSEVHLTVAVVTYR 396  
 R.norvegicus CPR ARRHILAILQDYP--SLRPPIDHLCCELLPRLQARYYSIASSSKVH-PNSVHICAVAVEYE 403  
 E.coli SiR ATTPIVDMVRFSP--AQLDAEALIN-LLRPLTPRLYSIASSQAEV-ENEVHVTVGVVRC 351  
 H.sapiens MSR ---CLLDLLLAFF--SCQPPLSLLLEHLPKLQPRPYS CASSSLFHPGKLHFVNIVEFLS 477  
 T.vaginalis Hyd HCKPPLDILM-----SCIPHIWPRLYCIASA-----PTNSSVIDLIISDR 366  
 L.interrogans FRN AYPYVIGQSGGVIPPGEDPEKKAKGLADVGYTVRLYSIASPSYSFGMKEDNIEFI IKRDN 120

G.intestinalis OR-1 NPKPRNGHSIQNSLGPSYLQRALISN-----EPIRIAILQNFSDSGLTMLLG 435  
 G.intestinalis OR-2 CETLSKTIEKRPGLSTGYLSRLQEGS-----AVFFQTFSSPVRGDEFRG 441  
 S.cerevisiae Tah18 TI----LRKIRRGICTNYIARLQEGE-----QIRYKLQNNH-I IKKEFLN 476  
 H.sapiens NDOR TR----LKEPRRGLCSSWLASLDPGQ-----GPVRVPLWVRPGS-LAFPETPD 450  
 R.norvegicus NOS TRD--GQGPLHHGVCSTWINNLKPED-----PVPCFVRSVSGFQLPEDPS 439  
 R.norvegicus CPR AK----SGRVNKGVATSWLRAKEPAG-----ENGGRALVPMFVRK-SQFRLPEFKST 449  
 E.coli SiR V----EGRARAGGASSFLADRVEEE-----GEVRVFI EHNDNFRLPTNPE 392  
 H.sapiens MSR TATTEVLRKGVCTGWLALLVASVLQPNIHASHEDSGKALAPKISISPRTTNSFHLPDDPS 537  
 T.vaginalis Hyd IFG---DGNSRNLCTSYLKRIPEMS-----KIALKTQHGIIFYPKNVD 407  
 L.interrogans FRN IYDENGNIQF-KGVCSNYMCDLKP GD-----EVTMTGPSGKKFLLPNTDFS 165

**NADP(H)binding side**

|                     |                                                              |     |
|---------------------|--------------------------------------------------------------|-----|
| G.intestinalis OR-1 | GKTALIGVAFGSGFAPFRAYHELRSATIASMDGVETLA-----PYLLLLSIPHAEP--QL | 487 |
| G.intestinalis OR-2 | VPSITVGLGTGLAPCRSRLQHRALRLEQLKRAAPGEFIQPLDPYMTFIGLRRESDLKEL  | 501 |
| S.cerevisiae Tah18  | KPMILVGPVGLAPLLSVVKAIEISKDIK-----LLFGCRYKDKDYIY              | 518 |
| H.sapiens NDOR      | TPVIMVGPPTGVAPFRAAIQERVAQQQTGNF-----LFFGCRWRDQDFYW           | 495 |
| R.norvegicus NOS    | QPCILIGPPTGIAPFRSFWQRLHDSQHRGLKG-G-----RMTLVFGCRHPEEDHLY     | 490 |
| R.norvegicus CPR    | TPVIMVGPPTGIAPFMGFIQERAWLREQGKE--VG-----ETLLYYGCRRSDEEDYLY   | 499 |
| E.coli SiR          | TPVIMIGPPTGIAPFRAFMQORAADEAPGKN-----WLFYFGNPHFTEDFLY         | 438 |
| H.sapiens MSR       | IPIIMVGPPTGIAPFIFGLQHREKLQEQHPDGNFG-----AMWLFYFGCRHKDRDYLF   | 589 |
| T.vaginalis Hyd     | TPIIMVAIGCGIAPMMSMLQHRQALYIEDKLN-IG-----SASLFFGCRNKGTYPYL    | 458 |
| L.interrogans FRN   | GDIMFLATGTGIAPFIFGMSEELLEHKLIKFTG-----NITLVYGAPYSDELVMM      | 214 |

|                     |                                                              |     |
|---------------------|--------------------------------------------------------------|-----|
| G.intestinalis OR-1 | LEELRRDVENGVIN-VVLCLTRDDGTD--NQKGLDIDS-----FTSAHGTFHLHIYKKGK | 538 |
| G.intestinalis OR-2 | IDELRDFVRKG-IATIFVAFSREEKSREWFEIIPNDADGHALADVDKTAFCAEYKCYVTR | 560 |
| S.cerevisiae Tah18  | KDMLLEDWFRKGIKIALHS-SFSRDEENS-----PGVKYVQD                   | 552 |
| H.sapiens NDOR      | EAEWQELEKRDCLTLP-AFSREQEQ-----KIYVQH                         | 526 |
| R.norvegicus NOS    | QEEMQEMVRKGVLFQVHTGYSLPQKP-----KVYVQD                        | 523 |
| R.norvegicus CPR    | REELARFHKGALQNLNVAFSREQAH-----KVYVQH                         | 531 |
| E.coli SiR          | QVEWQRYVKEGVLTRIDLAWSRDQKE-----KIYVQD                        | 470 |
| H.sapiens MSR       | RKELRHFLKHGILTHLKVFSRSDAPVG-----EEEAPAKYVQD                  | 627 |
| T.vaginalis Hyd     | DDVLNNFVENKCLQNLVAVYSREGTT-----NPYVTS                        | 490 |
| L.interrogans FRN   | DYLGLESKHKNFKLVT-AISREEKNSFD-----GGRMYISH                    | 250 |

|                     |                                                               |     |
|---------------------|---------------------------------------------------------------|-----|
| G.intestinalis OR-1 | RMGDVIHSSSIPDRLLRDLNRPDLVSVYCGPANDAVDTSNKVIENTMVGAEKYRTMRSENR | 598 |
| G.intestinalis OR-2 | LMGEYANNIRNFVTSKDT-CVI----TYCGKAGNVPQIEIEGVILRSLVSSGMTE--KDAK | 613 |
| S.cerevisiae Tah18  | YLWRLGEEITNLVNVKD--AVF----FLCGSSGKMPIQVRLTFIEMLKKGWGNFSDEETAK | 606 |
| H.sapiens NDOR      | RLRELGLSLVWELLDRQG--AYF----YLAGNAKSMADVSEALMSIFQEEGLC-SPDAA   | 579 |
| R.norvegicus NOS    | ILQKELADEVFSVLHGEQ-GHL----YVCGDVR-MARDVATTLKKLVAAKLNLS-EEQVE  | 576 |
| R.norvegicus CPR    | LLKRDREHLWKLIEGG--AHI----YVCGDARNMAKDVQNTFYDIVAEFGPME-HTQAV   | 584 |
| E.coli SiR          | KLREQGAELWRWINDG--AHI----YVCGDANRMAKDVQALLEVIAEFGGMD-TEAAD    | 522 |
| H.sapiens MSR       | NIQLHGQQVARILLQEN--GHI----YVCGDAKNMAKDVHDALVQIISKEVGVE-KLEAM  | 680 |
| T.vaginalis Hyd     | ALMDRMDEVWESWKDPN--CVIM---Y-CGPPIGVPDQIKTIMVRI SMKKGEMSREEAEK | 544 |
| L.interrogans FRN   | RVREQ-AEAVKKILNGG--GRF----YICGGPKGMEKGVIEEIQKISGNTGTY-EEFKHH  | 302 |

|                     |                                         |     |
|---------------------|-----------------------------------------|-----|
| G.intestinalis OR-1 | VHVEAY-----                             | 604 |
| G.intestinalis OR-2 | ARWEKLRADQNLI FEAW-----                 | 630 |
| S.cerevisiae Tah18  | KYLKEMEKS DRYIQETW-----                 | 623 |
| H.sapiens NDOR      | AYLARLQQTRRFQETWA-----                  | 597 |
| R.norvegicus NOS    | DYFFQLKSQKRYHEDIFGAVFSYGAKKGNTLEEPKGTSL | 615 |
| R.norvegicus CPR    | DYVKKLMTKGRYSLDVWS-----                 | 602 |
| E.coli SiR          | EFLSELRVERRYQRDVY-----                  | 539 |
| H.sapiens MSR       | KTLATLKEEKRYLQDIWS-----                 | 698 |
| T.vaginalis Hyd     | FCALHP----HLFESF-----                   | 556 |
| L.interrogans FRN   | LEGAHQLFVETY-----                       | 314 |
