# Supplementary material for: The Minimal Proteome in the Reduced Mitochondrion of the Parasitic Protist Giardia intestinalis
Source: PubMed Central journal article supplement (PMC3044749; doi:10.1371/journal.pone.0017285), 2011-02-24
Supplement: pone.0017285.s008.pdf [file pone.0017285.s008.pdf]

**Fig. S8**

|                        |                                                                                                                                                                                                                                                                                    |     |
|------------------------|------------------------------------------------------------------------------------------------------------------------------------------------------------------------------------------------------------------------------------------------------------------------------------|-----|
| <i>G. intestinalis</i> | -----MNTLF <span style="background-color: yellow;">SVSPMTMPFYRAYKAKQGSFFVVSSTFD</span> ----LPILVKISSTASQDYIVYPPIFVLAPHTAQE                                                                                                                                                         | 64  |
| <i>D. simulans</i>     | -----MELLSVGPQVLTFFYPPYDDRQRRMVTLLNPTDRRVLFKLLQVTSNAWLNYTVNPNTGRIAPYSSE                                                                                                                                                                                                            | 67  |
| <i>E. cuniculi</i>     | -----MLDIKIVPQTTIRVK----RNKRSSMFIVQNNSM---ESVGYKVKTTKPRDYIVRPNMGLIVPMQHA                                                                                                                                                                                                           | 61  |
| <i>H. sapiens</i>      | -MASASG <span style="background-color: yellow;">AMAKHEQ</span> ILVLDPPDTLKFKGPFDTDVVTTNLKLRNPSD---RKVCFKVKTTAPRRYCVRPNSGIIDPGSTVT                                                                                                                                                  | 75  |
| <i>C. briggsae</i>     | -----MSEKHSLLQVSPHRELVFTGPFSDVVTAHMTLKNITA---NPVCFKVKTTAPKQYCVRPNSGLLKNGESKQ                                                                                                                                                                                                       | 68  |
| <i>S. pombe</i>        | -----MALECDSTIVFPRPLTRLVKCDLELRNTAP----YPIGFKVKTTAPKQYCVRPNGGRIEANSAVS                                                                                                                                                                                                             | 61  |
| <i>P. falciparum</i>   | -----MKLLRVTP <span style="background-color: yellow;">EKNI</span> EFLVHFQAVTQVVKLENVSD---KKVAFKIKTTAPNNYLVRPSFGLISVRETIE                                                                                                                                                           | 64  |
| <i>T. brucei</i>       | -----MRSKTAAPS <span style="background-color: yellow;">VIVT</span> PDRLHMTAKRKEECLVQITNIS-FEKVLF <span style="background-color: yellow;">RMLTTT</span> PERYL <span style="background-color: yellow;">VKPTKGV</span> IEPSASAS                                                       | 67  |
| <i>P. infestans</i>    | MASSGVDVALA <span style="background-color: yellow;">PNSSVILEPADSLSFHLQ</span> PQTAPQAVLTIRNVADD---RQIAFKVKTT <span style="background-color: yellow;">RPLRYLVRPNQGLLGP</span> NGSAS                                                                                                 | 77  |
| <i>G. intestinalis</i> | ICVSLTL-----KEELKPHEDHRYSVDAFFLEQGAYASLSTDASPO-PTALRIYWN <span style="background-color: yellow;">SHYNDACRKGRLFTQKFTVS</span>                                                                                                                                                       | 134 |
| <i>D. simulans</i>     | IIISLKS-----FDFNTDERYNHFFVIKSMFEPQDHKN-----GQTILAI <span style="background-color: yellow;">FR</span> ----DVSRRDISNTLLVR                                                                                                                                                            | 124 |
| <i>E. cuniculi</i>     | VEVTLSE-----DTVPDSSHKFLIEIYRFDWRRS-----LSDFKQHLK-----SSSPKPCWTSRIGIL                                                                                                                                                                                                               | 114 |
| <i>H. sapiens</i>      | VSVMLQP-----FDYDPNEKSKHKFMVQTI <span style="background-color: yellow;">FAPPN</span> -----TSDMEAVWK-----EAKPDEL <span style="background-color: yellow;">MDSKLR</span> CV                                                                                                            | 129 |
| <i>C. briggsae</i>     | ITVMLQP-----LEGIPTDAGRHKFMVQSCVAPAED-----LQDLES <span style="background-color: yellow;">IWK</span> -----IVDPAELTY <span style="background-color: yellow;">SKLMVT</span>                                                                                                            | 123 |
| <i>S. pombe</i>        | VEVILQP-----LDHEPAPGTKCRDKFLVQSTELKPELQ <span style="background-color: yellow;">G</span> -----MDIADI <span style="background-color: yellow;">WT</span> -----QVSKAN <span style="background-color: yellow;">ISERKIR</span> CV                                                       | 119 |
| <i>P. falciparum</i>   | IQIILQP-----LSDKDNISNDKFQVQCLNVDDN-----TTVDKQ <span style="background-color: yellow;">FWI</span> -----TVNKNE <span style="background-color: yellow;">IQDHKL</span> IVV                                                                                                             | 117 |
| <i>T. brucei</i>       | VLITLSP----TTARGEDVSDVNATDDFRLEYCLQEPEDCIEPR-----CTNVPAL <span style="background-color: yellow;">IKE</span> --KKQD <span style="background-color: yellow;">RRLVH</span> SKTVRCT                                                                                                    | 134 |
| <i>P. infestans</i>    | IMVILQ <span style="background-color: yellow;">QKDCDELLRLDPAERQLANDKFLVQ</span> SIYVDDSFYELVKT <span style="background-color: yellow;">KSTKEMADELTMWA</span> -----RTDK <span style="background-color: yellow;">RALS</span> NK <span style="background-color: yellow;">KLRCR</span> | 152 |
| <i>G. intestinalis</i> | FVDG-----APPAAVQKLARHVPAEILD <span style="background-color: yellow;">SKDLD</span> -----TELGN <span style="background-color: yellow;">ISHKKARY</span>                                                                                                                               | 175 |
| <i>D. simulans</i>     | LEA-----QPFPLDCHGLDSL <span style="background-color: yellow;">CDFSK</span> -----                                                                                                                                                                                                   | 145 |
| <i>E. cuniculi</i>     | YEE-----                                                                                                                                                                                                                                                                           | 117 |
| <i>H. sapiens</i>      | FEM-----PNEND-KLGITPPGNAPT <span style="background-color: yellow;">VTSMSSINNTVATPAS</span> YHTKDDPRGLSVLKQEKQKNDMEPSKAVPLN                                                                                                                                                         | 196 |
| <i>C. briggsae</i>     | FVD-----KKN-----PASGDDNKTFTV <span style="background-color: yellow;">NGNEETFASAG</span> -----QAQELGSS <span style="background-color: yellow;">SFSAPS</span>                                                                                                                        | 165 |
| <i>S. pombe</i>        | YSEGPSTANAHANAHQPAQTTTT <span style="background-color: yellow;">SIPTSATDN</span> YTTVNGNVNQSYSGIDGTALPSTHANPVAAPSTATTQHTQLPKTSA                                                                                                                                                    | 199 |
| <i>P. falciparum</i>   | LND-----ENNSKLNHSY <span style="background-color: yellow;">IPSNNVPLSEMNNKNIHNMGYVD</span> -----NNNINQDD <span style="background-color: yellow;">PNL</span>                                                                                                                         | 164 |
| <i>T. brucei</i>       | VDLT-----AVNGKWGEVRLRD-----                                                                                                                                                                                                                                                        | 151 |
| <i>P. infestans</i>    | FVQ-----DGEDTGRPASPPSPQRPSSTNVSPAKTTATSESRFQTRQSDEAREEV <span style="background-color: yellow;">TTPMQLSSALLQDDKPKV</span>                                                                                                                                                          | 220 |
| <i>G. intestinalis</i> | IAEKAS----- <span style="background-color: yellow;">LLHSIQLOQGGKIDLLKNTISRDEAEILRFNREIDELQRR</span> -----                                                                                                                                                                          | 220 |
| <i>D. simulans</i>     | -----SSVNT <span style="background-color: yellow;">ELQLRQLYENCANRLEEAPAKQNTPSGSRHLS</span> -----                                                                                                                                                                                   | 182 |
| <i>E. cuniculi</i>     | -----EEISKEVVE <span style="background-color: yellow;">CSED</span> RG-----                                                                                                                                                                                                         | 132 |
| <i>H. sapiens</i>      | ASKQDG-----PMPKP-HSVSLNDTETR <span style="background-color: yellow;">KLMEECKRLQ</span> GEMMKLSEENRHLRDEGL--RLRKV                                                                                                                                                                   | 251 |
| <i>C. briggsae</i>     | -SQQDG-----TVASLRKSLKST <span style="background-color: yellow;">IDEKEELQKKVHGLEQEIEVMLKKNRKLQ</span>                                                                                                                                                                               | 212 |
| <i>S. pombe</i>        | VSHQKP-HEAPSTAVKAPTATVAENEPYKPKQSVPTT <span style="background-color: yellow;">TSPNNENNALRSTANVINNTRQSTATSPSMFAGNSGNQIGLAR</span>                                                                                                                                                   | 278 |
| <i>P. falciparum</i>   | ADGLKG----- <span style="background-color: yellow;">GLPGMQRYHELLNYCVFVDKQKA</span> ALEKENESLKN-----                                                                                                                                                                                | 205 |
| <i>T. brucei</i>       | -----DGNGTGRGSKGK <span style="background-color: yellow;">NVI</span> SAVLN <span style="background-color: yellow;">SRKREEV</span> PGQVKASLAGQKQ-----                                                                                                                               | 191 |
| <i>P. infestans</i>    | AESREGGKDIQ <span style="background-color: yellow;">EVAALRKKYDELVAFTVQLTAQRDVLMSDLDKTRQLLQKANTDAQRVKKI</span> SEESTGLRHRKTGGASGVS                                                                                                                                                  | 300 |

|                        |                 |                             |                                 |          |           |     |
|------------------------|-----------------|-----------------------------|---------------------------------|----------|-----------|-----|
| <i>G. intestinalis</i> | -LKEI           | GNHDTLSKYIIIGTRLELRVVHYILAI | FV                              | CLIC     | GRLLHKF-- | 263 |
| <i>D. simulans</i>     | -----           | KIVIIIGSLTLVVLTAFVQRRLMFET  | FMDTQYADIHFQ---                 |          |           | 219 |
| <i>E. cuniculi</i>     | -----           | AAVLLVEMYILLNILYLFYRFFE     | -----                           |          |           | 155 |
| <i>H. sapiens</i>      | AHSDKPGSTSTASFR | ---DNVTSPLPSLLVVIAAIFI      | GFFLCKFIL                       |          |           | 294 |
| <i>C. briggsae</i>     | -----           | NQSDGALV                    | ---EGAFPTLQVVLIAVAALLIGLIFGHLF- |          |           | 247 |
| <i>S. pombe</i>        |                 | VSSSFGRPTSGAKVVPQIHNTVTVQ   | TAFLLAII                        | CFLIGLLF | ----      | 319 |
| <i>P. falciparum</i>   | -QLKAYNSNSNKFLI | ---DNKLIPIIIIVMLAIITKYM     | GYW                             | -----    |           | 241 |
| <i>T. brucei</i>       | -----           | AGGNSLMWIIIGGAATLFCWWW      | FAY---                          |          |           | 216 |
| <i>P. infestans</i>    |                 | GTEDSQAITSKGPKD             | ---QGAFGPLHLLVCAIIFFLV          | CRY      | ----      | 338 |
