# Supplementary material for: The Minimal Proteome in the Reduced Mitochondrion of the Parasitic Protist Giardia intestinalis
Source: PubMed Central journal article supplement (PMC3044749; doi:10.1371/journal.pone.0017285), 2011-02-24
Supplement: pone.0017285.s009.pdf [file pone.0017285.s009.pdf]

# Fig S9

|                           |                                                                                      |     |
|---------------------------|--------------------------------------------------------------------------------------|-----|
| <b>Giardia_AbcB</b>       | MLEEGGLCSAVNVPEVNGKVGCTGGGQYEARRRASEKDGPCIYGLIVKIAKNRRKPVALTSGRTIMSKAATAPSVSEDK      | 80  |
| <b>Saccharomyces_Atm1</b> | -----MLLLPRCFVIGRIVRSKF                                                              | 18  |
| <b>Saccharomyces_Mdl1</b> | -----MIVRM                                                                           | 5   |
| <b>Homo_AbcB7</b>         | -----MALLAMHSWRWAAAAAAFEKRRHSAILIRPLVSVSGSGPQWRPHQLGA                                | 48  |
| <b>Homo_AbcB10</b>        | -MRGPPAWPLRLLLEPPSPAEPGRLLPVACVWAAASRVPSGLSPTGLRPARLWAGAPALLWGVGAARRWRSGCRGGGPGA     | 79  |
| <b>Arabidopsis_Atm3</b>   | -----MSRGSRFVRAPGLLLCRVNLQPQPKIPSFYSLSRSDYRLHNGFSNYIRRN                              | 50  |
| <b>Naegleria_Atm1</b>     | -----                                                                                | 1   |
| <b>Rhodobacter_AbcB</b>   | -----                                                                                | 1   |
| <b>Halobacterium_AbcB</b> | -----                                                                                | 1   |
| <b>Giardia_AbcB</b>       | SIVQHSSTFRASPFHKRQRRESILTMLAILYMDAGKILLYLLKILQSIILSFWMSTLSITINAYAIASQNTGFYRLTRRH     | 160 |
| <b>Saccharomyces_Atm1</b> | RSGLIRNHSFVIFTVSKLSTQRPLLEFNSAVNLNQAQKDI THKKSVEQFSSAPKVKTQVKKTSKAPTLSELKILKDLFRY    | 98  |
| <b>Saccharomyces_Mdl1</b> | IRLCKGPKLLRSQFASASALYSTKSLFKPMYQKAEINLI I PHRRKSIRLQSDIAQGGKSTKPTLKLNSNANSKSSGFKDIKR | 85  |
| <b>Homo_AbcB7</b>         | LGTARAYQQIIPESLKSITWQRLGKGNQSGFLDAAKALQVWPLIEKRTCWGHAGGGLHTDPKEGLKVDVTRKIIKAMLSY     | 128 |
| <b>Homo_AbcB10</b>        | SRGVLGLARLLGLWARGPGSCRCGAFAGPGAPRLPRARFPGGPAAAAWAGDEAWRRGPAAPPDGDKRLRPAAGLPEARL      | 159 |
| <b>Arabidopsis_Atm3</b>   | SIRTSFVINAFLSDNSPSPSPSPPIRFVQRSSMLNGLRFLSTSPNPDQTTTKEIKTSSSDSDSAMADMKILRTLGLAY       | 130 |
| <b>Naegleria_Atm1</b>     | -----                                                                                | 1   |
| <b>Rhodobacter_AbcB</b>   | -----MSEARQRPQPTPADPPELSGWATMKRMAY                                                   | 30  |
| <b>Halobacterium_AbcB</b> | -----MSTAPDNEGDDDFEEQRADVDNAMVQ                                                      | 27  |
| <b>Giardia_AbcB</b>       | IHQEYFKTFEEGYRAGFSWLVRMIDRFLNQKSLAVHLSNEVVENPFG-----DTVCGMEHALVYMCVQFFILSFWSFC       | 234 |
| <b>Saccharomyces_Atm1</b> | IWPKGNKVRIRVLIAGLLISAKILNVQVPPFFKQTIIDSMN-----IAWDDPTVALPAAIGLTILCYGVAR-             | 165 |
| <b>Saccharomyces_Mdl1</b> | LFVLSKPEISKY-IGLALLLILISSVSMVPSVIGKLLDLASESDGEDE-----EGSKSNKLYGFTKKQFFALGAVF-        | 157 |
| <b>Homo_AbcB7</b>         | VWPKDRPDLRARVAISLGLGGAKAMNIVVPMFKYAVDSLQMSGN-----MLNLSDAPNTVATMATAVLIGYGVSR-         | 201 |
| <b>Homo_AbcB10</b>        | LLGLAYPERRR-LAAAVGFLTMSSVIMSAPFFLGKIIDVIYNTPTVD-----YSDNLRCLGLSAV-                   | 222 |
| <b>Arabidopsis_Atm3</b>   | LWMRDNPEFRFRVIAALGFLVGAQVNLVQVFFLKLAVDWLASATGTGASLTTFAATNPTLLTFVATPAVLIGYGIAR-       | 209 |
| <b>Naegleria_Atm1</b>     | -----MGLLIGAKIFNVSVPPFFKRAVDSFGPATET-----IIQDPVAVFMTMG-PISMIIGYGIK-                  | 55  |
| <b>Rhodobacter_AbcB</b>   | LWPKGQTVVKKRVI IAMVMLVLAKVISVSTPFFYKAAVDALAG-----DAPSPAFMLGLGAVGMTVAYGLAR-           | 97  |
| <b>Halobacterium_AbcB</b> | LFDEYGRDHSFQAVAVLASVFARVLDLAPPVLLGLAIDSVIQNK-----FLPFLPQSVVPSKPDRLFLMGGLIAG          | 101 |
| <b>Giardia_AbcB</b>       | YSILQAYIQRISNVIKDIINNRIYISFSLVLLTRHLSQPYQQLEQESSGERASTLNEYSQTMANLITGLEKAI PSVSYF     | 314 |
| <b>Saccharomyces_Atm1</b> | --FGSVLFGELRNVAFAKVAQNAIRTVSLQTFQHLMKLDLGGWHLRSQTGGLTRAMDRGTKGISQVLTAMVFHII P----    | 238 |
| <b>Saccharomyces_Mdl1</b> | --IIGAVANASRI IILKVTGERLVARLRTRTKAALDQDATFLDTNRVGDLSIRLSSDASIVAKSVTQNVSDGTR----      | 230 |
| <b>Homo_AbcB7</b>         | --AGAAFFNEVRNAVFGKVAQNSIRRIAKNVFLHLHNLDFLHLSRQTGALSKAIDRGRTRGISVFLVFNLLP----         | 274 |
| <b>Homo_AbcB10</b>        | --LCGAAANAIRVYLMQTSQGRIVNRLRSLFSSILRQEVAFDQKTRTRELINRSLSDTALLGRSVTENLSDGLR----       | 295 |
| <b>Arabidopsis_Atm3</b>   | --TGSSAFNELRTAVFSKVALRTIRSVSRKVFSLHLDLRLYHLSRETGGLNRIIDRGSRAINFILSAMVFNVP----        | 282 |
| <b>Naegleria_Atm1</b>     | --TLSSLFTELRGAVFAKVTQASIRLISLGVFSKLLNMDLNFHLQRKTGALTSTMDRGRKGINFLMTSLLFNIVP----      | 128 |
| <b>Rhodobacter_AbcB</b>   | --LGAVAFGELRDAIFVRVQQRALRQLALETFTHIRLSLRYHISRKTTGGLSRIIERGVKGVDFLLRFLMFSIGP----      | 170 |
| <b>Halobacterium_AbcB</b> | SFLLGAAFWIRNWFNSFSQHIQHRVRTDITYDKMQRNLNMDFFATKQTGEMMSILSNDVNRLEFLNDGLNSAFR----       | 176 |
| <b>Giardia_AbcB</b>       | LIMLVTTLLREKPSLNSLNDEKTNVANRKPKRKDSKPKQFSSIASTIHDRHALALILIALLPVPFNVFVVASVERQRFAL     | 394 |
| <b>Saccharomyces_Atm1</b> | -----ISFEISVVCGILTYQFGASFAAIFSTMLLYSIFTIKTAWRTHF                                     | 283 |
| <b>Saccharomyces_Mdl1</b> | -----AI IQGFVFGMMSFLS-WKLTVMMLIAPPLGAMALIYGRKIRNL                                    | 274 |
| <b>Homo_AbcB7</b>         | -----IMFEVMLVSGVLYKCGAQFALVTLGTLGTYTAVTAVTRWRTRF                                     | 319 |
| <b>Homo_AbcB10</b>        | -----AGAQAQSVGISMMFFVS-PNLATFVLSVVPVSI IAVIYGRYLRKL                                  | 339 |
| <b>Arabidopsis_Atm3</b>   | -----TILEISVSGILAYKFGAFAWIITSLSGSYIVFTLAVQWRKF                                       | 327 |
| <b>Naegleria_Atm1</b>     | -----TMLELSIVTAIFYINYGPSFALTALGVSVTLAAWTITVTQWRTKI                                   | 173 |
| <b>Rhodobacter_AbcB</b>   | -----LILELTLVAIIFAVVFGLSYMAVVVATIALYVAFTFKVTEWRVQI                                   | 215 |
| <b>Halobacterium_AbcB</b> | -----LSVMVLAIG-VYLFVVNWQLAVLTMPLVPIIALFTYRFVNAIQPK                                   | 220 |
| <b>Giardia_AbcB</b>       | SSSRNSAKMQSVALLTEVTSRYRLIKLYDAVSYEISNVCKLMHKFKSVDIVNILLRSTSRKVKSLTKRYTSSVLTLSGSAI    | 474 |
| <b>Saccharomyces_Atm1</b> | RRDANKADNKAASVALDLSLINFVAVKYFNNEKYLADKYNGSLMNYR-----DSQIKVQSFLAFLNSGQNLIFTTA         | 353 |
| <b>Saccharomyces_Mdl1</b> | SRQLQTSVGGTLKVAEEQLNATRITQAYGGEKNEVRRYAKEVRNVF-----HIGLKEAVTSGLFFGSTGLVGNTA          | 344 |
| <b>Homo_AbcB7</b>         | RIEMNKADNDAGNAIDSLLNYETVKYFNNEREYQRYDGLFKTYE-----TASLKSTSLAMLNFGQSAIFSVG             | 389 |
| <b>Homo_AbcB10</b>        | TKVTQDSLQATQLAEERIGNVRTVRAFGEKTEIEKYASKVDHVM-----QLARKEAFARAGFFGATGLSGNLI            | 409 |
| <b>Arabidopsis_Atm3</b>   | RKAMNKADNDASTRADSLINYEYVVKYFNNEGYEAEKYDQFLKKYE-----DAALQTRSLAFLNFGQSIIFSTA           | 397 |
| <b>Naegleria_Atm1</b>     | RKQMNKAENEASGVVDSLINYEYVVKYFQNEKYESEKYDEHLKKYE-----QTSLSIASLSALNFGQTFIFSCA           | 243 |
| <b>Rhodobacter_AbcB</b>   | RRQMNEQDNDANQKAI DLSLNFETVKYFGAEQREARYDVAMAGYE-----KAAVKTGQSLAFLNAGQSLITITAG         | 285 |
| <b>Halobacterium_AbcB</b> | YADVRSSVGHLSRLENNLGGIQVIKTSNTERYESDRVDDVSQGYF-----DANWGAITIRIKFFPALRIISGVG           | 290 |
| <b>Giardia_AbcB</b>       | YLSLNLISYRQIQQIRYIVSTVTQITKLEIIPGVIVDIHEHFVVIKELSKPQEAAGLSSDNTVGFAATCAYLQQHWTDI      | 554 |
| <b>Saccharomyces_Atm1</b> | LTAMMYMGCTGVIGG-----NLTVGDLVLINQLVFLQSLVPL-----NFLGSVYRDL                            | 399 |
| <b>Saccharomyces_Mdl1</b> | MLSLLLVTGSMIQSG-----SMTVGLSSFFMYAVYTGSSL-----FGLSIFYSEL                              | 390 |
| <b>Homo_AbcB7</b>         | LTAIMVLSAQGIVAG-----TLTVGDLVMVNGLLFQLSLPL-----NFLTGVYRET                             | 435 |
| <b>Homo_AbcB10</b>        | VLSVLYKGGLLMGS-----HMTVGLSSFLMYAFWVGISI-----GGLSIFYSEL                               | 455 |
| <b>Arabidopsis_Atm3</b>   | LSTAMVLCSQGIMNG-----QMTVGDLMVNGLLFQLSLPL-----NFLGSVYRET                              | 443 |
| <b>Naegleria_Atm1</b>     | LTYIMYITANKITTG-----ELTVGDLVMVNTLLFQLSIPL-----NFLTGMTYRET                            | 289 |
| <b>Rhodobacter_AbcB</b>   | LVAVMVMMAAYGVQAG-----QLTVGDFVMVNAIYMIQITLPL-----GFLTGVYREI                           | 331 |
| <b>Halobacterium_AbcB</b> | FVLTFVIGGIWVATGPPMFFSGTIDPGEFVTFILLSQQFIWPM-----AQFQIINMY                            | 343 |

|                           |                                                                                     |     |
|---------------------------|-------------------------------------------------------------------------------------|-----|
| <b>Giardia_AbcB</b>       | TRSSCKADSSFSLKAWTRSFFKRAACYINIGIIKIIPPVFRYKYPASLVTSTSPDINERMYVQELMAESQQYVTLQEPFP    | 634 |
| <b>Saccharomyces_Atm1</b> | KQSLIDMETLFLKLRKNE-----VKIKNAER--PLMLPEN-----                                       | 431 |
| <b>Saccharomyces_Mdl1</b> | MKGAGAAARVFELNDRK-----PLIRPTIGKDP-VSLAQ-----                                        | 423 |
| <b>Homo_AbcB7</b>         | RQALIDMNTLFTLLKVD-----TQIKDKVMASPLQITP-----                                         | 468 |
| <b>Homo_AbcB10</b>        | MKGLGAGGRLWELLERE-----PKLPFNEGVLNKEFSQ-----                                         | 489 |
| <b>Arabidopsis_Atm3</b>   | IQSLVDMKSMFQLLEEK-----SDITNTSDAKPLVLKG-----                                         | 476 |
| <b>Naegleria_Atm1</b>     | SQAITDIENLFTLLDSK-----NDTQDSSD-KELIIGGP-----                                        | 322 |
| <b>Rhodobacter_AbcB</b>   | RQALVDMGQMFGLLGQP-----AEVTDAPDAKPLAVAG-----                                         | 364 |
| <b>Halobacterium_AbcB</b> | QRARASSERIFGLMNEP-----SRIENPDADDELVVDD-----                                         | 376 |
| <b>Giardia_AbcB</b>       | LTRPIQPCTPTSIEFRDVCFSY--KTGCDILHGLTLSVHPGQKVAIVGRSGIGKSTIINLLTRLYTTPQPDTSPPGIYL     | 712 |
| <b>Saccharomyces_Atm1</b> | -----VPYDITFENVTFGY--HPDRKILKNASFTIPAGWKTAIVGSSGSGKSTILKLVFRFYDP-----ESGRILI        | 495 |
| <b>Saccharomyces_Mdl1</b> | -----KPIVFKNVSFYTPTRPKHQIFKDLNITIKPGEHVCAVGPSSGSGKSTIASLLLRYYDV-----NSGSIEF         | 487 |
| <b>Homo_AbcB7</b>         | -----QTATVAFDNVHFY--IEGQKVLSGISFEVPAGKKAIVGSSGSGKSTIVRLLFRFYEP-----QKGSYIL          | 532 |
| <b>Homo_AbcB10</b>        | -----GALEFKNVHFAYPARPEVPIFQDFSLSPSGSVTALVGPSSGSGKSTVLSLLLRYYDP-----ASGTISL          | 553 |
| <b>Arabidopsis_Atm3</b>   | -----GNIEFENVHFSY--LPERKILDGISFVVPAGKSAIVGTSGSGKSTILRMLFRFFDT-----DSGNIRI           | 538 |
| <b>Naegleria_Atm1</b>     | -----TDTEIEFRNVSFY--DPNRKILDNVSFVKVAGTMTGICGPSSGSGKSTILKLIYRFYDP-----TEGQIFI        | 386 |
| <b>Rhodobacter_AbcB</b>   | -----GTVELENVHFGY--DPGRIILKGISLVEAGETVALVGPSSGSGKSTIGRLLFRFYDV-----NEGAIIRI         | 426 |
| <b>Halobacterium_AbcB</b> | -----GGVYDDVRFY--DDDDAIVEHIDFQVDGGDTLALVGPSTGAGKSTVLKLLLRMYDV-----DAGAVRV           | 438 |
| <b>Giardia_AbcB</b>       | NGRAIGSIPREELRRLITVVPQDNILIRGSATDNIAYGQPRKLPGSHAEERQRYIREVIRLCYEASRVA               | 792 |
| <b>Saccharomyces_Atm1</b> | NGRDIKEYDIDALRKVIGVVPQDTPLFNDTIWENVKFR----IDATDEEVITVVEKAQLAPLIKKLPQGFDTIVGERG      | 570 |
| <b>Saccharomyces_Mdl1</b> | GDEDIRNFNLRKYRRLIGVQCEPLLNGTILDNILYCI PP--EIAEQDDRIRRAIGKANCTKFLANFPDGLQTMVGARG     | 565 |
| <b>Homo_AbcB7</b>         | AGQNIQDVLSLESLRAVGVVPQDAVLFHNTIYYNLLYGN----ISASPEEVYAVAKLAGLHDAILRMPHGYDTQVGERG     | 607 |
| <b>Homo_AbcB10</b>        | DGHDIRQLNPVWLRSKIGVVSQEPILFSCSIAENIAYGADD--PSSVTAEIQRVAEVANAVAFIRNFPQGFNTVVGERG     | 631 |
| <b>Arabidopsis_Atm3</b>   | DGQDIKEVRLDSLRSIGVVPQDTPVLFNDTIFHNIHYGR----LSATEEEVYEAARRAAIHETISNFPDKYSTIVGERG     | 613 |
| <b>Naegleria_Atm1</b>     | NGQDIKTVLSLESLRKHIGVVPQDCVLFNDTLRHNIEYGR----LGCSEEDIKMAASKAKLSEIERLPGLETVPVGERG     | 461 |
| <b>Rhodobacter_AbcB</b>   | DGQDLRSVTQDSLHARIGVVPQDTPVLFNDTIFYNIAYGR----PDATPEEVEAAARAAKIHDFILRLPDGYRTMVGARG    | 501 |
| <b>Halobacterium_AbcB</b> | DGQDISGVTLP SLRRHVGVVSDTFLFYGTVEENITYGT----FDADREAVVDAKAAEAHEFIQNLDPGYDTEVGERG      | 513 |
| <b>Giardia_AbcB</b>       | YSGTLQGLSGGQQRVGIARAVARGGSVLVLDDEATSSALDEETEKRVLQQLFRSLDR-NQSVVITSHLSTLRHVLDLIYIL   | 871 |
| <b>Saccharomyces_Atm1</b> | LM-----LSGGEQRLAIAARVLLKNARIMFFDDEATSSALDTHTEQALLRTIRDNFTSGSRTSVYIAHRLRTIADADKIIVL  | 645 |
| <b>Saccharomyces_Mdl1</b> | AQ-----LSGGQQRIALARAFLLDPAVILLDDEATSSALDSQSEEVAKNLQRRVER-GFTTISIAHRLSTIKHSTRVIVL    | 639 |
| <b>Homo_AbcB7</b>         | LK-----LSGGEQQRVAIARAILKDPPEVILYDDEATSSALDSITEETILGAMKDVK--HRTSIFIAHRLSTVVDADEIIVL  | 680 |
| <b>Homo_AbcB10</b>        | VL-----LSGGQQRVIAIARALLKNPKILLDDEATSSALDAENEYLVEALDRLMD--GRTVLVIAHRLSTIKNANMVAVL    | 704 |
| <b>Arabidopsis_Atm3</b>   | LK-----LSGGEQQRVALARTFLKSPAILLCCDEATSSALDSTTEAEILNALKALAS--NRTSIFIAHRLTTAMQCDEIIVL  | 686 |
| <b>Naegleria_Atm1</b>     | LK-----LSGGEQQRVAIARAILKSPKILCCDEATSSALDSNTEKEIMKSEELFG--KTTSIMIAHRLSTIQRADQIIVL    | 534 |
| <b>Rhodobacter_AbcB</b>   | LK-----LSGGEQQRVGIARTLLKNPPEILLDDEATSSALDTQTERDIQDSLREMG--GRTVITIAHRLSTIADADRIIVL   | 574 |
| <b>Halobacterium_AbcB</b> | VK-----LSGGQQRVIDIARAILKDPPEVILVLDDEATSSALDTETEMLIQRSLDRLTE--DRTTESIAHRLSTIKDADQIVL | 586 |
| <b>Giardia_AbcB</b>       | DNPDGSGARVVEESGSYDWFVAESQYLKDAQDISDLVSNCGCSSAGVTPGFSHATLDAKGD-----                  | 933 |
| <b>Saccharomyces_Atm1</b> | DN-----GRVREEGKHLELLAMPGLSRELTWTIQEDLDHLENELKDQQL-----                              | 690 |
| <b>Saccharomyces_Mdl1</b> | GKH----GSVVTGSRFDLIAIPNSELNALLAEQQDEEGKGGVIDLNSVAREV-----                           | 689 |
| <b>Homo_AbcB7</b>         | DQ-----GKVAERGTHHGLLANPHSIYSEMHWTQSSRVQNHDPKWEAKKENISKEERKQLQEEIVNSVKGCNCSC         | 753 |
| <b>Homo_AbcB10</b>        | DQ-----GKITEYKHEELLSKPNGIYRKL MNKQS-----FISA-----                                   | 738 |
| <b>Arabidopsis_Atm3</b>   | EN-----GRVVEQGPHELLGK-SGRYAQLWTTQQNSVMDLDAIKLE-----                                 | 728 |
| <b>Naegleria_Atm1</b>     | NNT----GSIAECGSHEELISKHEGIYVEMWKRQVH-----                                           | 566 |
| <b>Rhodobacter_AbcB</b>   | EE-----GRIIEEGRHEQLLAR-GGRYAAMWLRQSAEEEEAA-----                                     | 610 |
| <b>Halobacterium_AbcB</b> | ED-----GEIVERGTHADLLGD-EGLYANLWGVQAGEIDELPDEFIERAAKQATVDDQDDD-----                  | 642 |
