# Supplementary material for: The Minimal Proteome in the Reduced Mitochondrion of the Parasitic Protist Giardia intestinalis
Source: PubMed Central journal article supplement (PMC3044749; doi:10.1371/journal.pone.0017285), 2011-02-24
Supplement: pone.0017285.s011.pdf [file pone.0017285.s011.pdf]

Table S2. List of *Giardia* proteins within the mitochondrial distribution range (MID) identified by LC MS/MS.

| GiardiaDB r1.1                                          |                | PSI BLAST          |                                                                                 |       |            | PFAM  |      |            |             |                  |
|---------------------------------------------------------|----------------|--------------------|---------------------------------------------------------------------------------|-------|------------|-------|------|------------|-------------|------------------|
| Annotation                                              | Accession No.  | ACCESSION          | DEFINITION                                                                      | Score | E-Value    | start | end  | ID No.     | E-value     | Protein families |
| PAM18                                                   | XP_002364144   | ref:XP_001581820.1 | DnaJ domain containing protein [Trichomonas vaginalis G3]                       | 54    | 0.000005   |       |      |            |             |                  |
| Hypothetical protein                                    | GL50803_10016  |                    |                                                                                 |       |            | 154   | 230  | PF00085.13 | 0.0011      | Thioredoxin      |
| Kinesin-3                                               | GL50803_102101 | gb:EFA85017.1      | kinesin-3 [Polysphondylium pallidum PN500]                                      | 400   | e-109      | 591   | 829  | PB004124   | 2.6E-73     | Pfam-B_4124      |
| Ornithine carbamoyltransferase                          | GL50803_10311  | ref:XP_001315726.1 | ornithine carbamoyltransferase family protein [Trichomonas vaginalis G3]        | 328   | 6E-88      | 159   | 319  | PF00185.17 | 2.3E-46     | OTCase           |
| Tenascin precursor                                      | GL50803_10330  | gb:EDL26780.1      | mCG134590, isoform CRA_c [Mus musculus]                                         | 81    | 1E-13      | 24    | 67   | PF01826.10 | 0.00017     | TIL              |
| High cysteine membrane protein Group 1                  | GL50803_103454 | gb:AAW83026.1      | proprotein convertase 6C [Xenopus lae...]                                       | 57    | 0.000008   | 334   | 717  | PF03302.6  | 3.2E-38     | VSP              |
| Chaperonin 60                                           | GL50803_103891 | ref:ZP_01548078.1  | chaperonin GroEL [Stappia aggregata IAM 12614]                                  | 365   | 5E-99      | 25    | 535  | PF00118.17 | 1.9E-101    | Cpn60_TCP1       |
| Hypothetical protein                                    | GL50803_111809 |                    |                                                                                 |       |            |       |      |            |             |                  |
| Alpha-tubulin                                           | GL50803_112079 | gb:AAW8301.1       | alpha-tubulin [Encephalitozoon intestinalis]                                    | 872   | 0          | 263   | 392  | PF03953.10 | 2.4E-51     | Tubulin_C        |
| Elongation factor 1-alpha                               | GL50803_112312 | pir:S70634         | translation elongation factor eEF-1 alpha chain - Hexamita sp. (strain ATCC719) |       | 0          | 5     | 216  | PF00009.20 | 6.6E-56     | GTP_EFTU         |
| Hypothetical protein                                    | GL50803_11237  |                    |                                                                                 |       |            | 230   | 427  | PB011818   | 3.7E-49     | Pfam-B_11818     |
| Ribosomal protein S4                                    | GL50803_11359  | dbj:BAE20168.1     | ribosomal protein S4 [Panax ginseng]                                            | 314   | 6E-84      | 95    | 169  | PF00900.13 | 3.4E-29     | Ribosomal_S4e    |
| Cysteine protease                                       | GL50803_113656 | ref:XP_001741082.1 | cysteine proteinase ACP1 precursor [Entamoeba dispar SAW760]                    | 76    | 2E-11      | 449   | 518  | PF00112.16 | 2E-19       | Peptidase_C1     |
| Long chain fatty acid CoA ligase, putative              | GL50803_113892 | ref:XP_002449702.1 | hypothetical protein SORBIDRAFT_05g021840 [Sorghum bicolor]                     | 214   | 3E-53      | 79    | 642  | PF00501.21 | 1.5E-80     | AMP-binding      |
| High cysteine membrane protein Group 4                  | GL50803_114042 | ref:XP_001021017.1 | hypothetical protein THERM_00305540 [Tetrahyena thermophila]                    | 73    | 2E-10      | 778   | 810  | PF03302.6  | 0.0000022   | VSP              |
| VSP with INR                                            | GL50803_11470  | ref:XP_001021653.1 | hypothetical protein THERM_00151170 [Tetrahyena thermophila]                    | 102   | 2E-19      | 532   | 673  | PF03302.6  | 2.1E-50     | VSP              |
| Hypothetical protein                                    | GL50803_114777 | gb:AB115615.1      | hypothetical protein [Spiroplasma birkbeckii]                                   | 251   | 3E-64      | 2     | 192  | PB000845   | 1.4E-33     | Pfam-B_845       |
| VSP                                                     | GL50803_11521  | ref:XP_214004.4    | PREDICTED: similar to Fras1 protein [Rattus norvegicus]                         | 108   | 3E-21      | 487   | 628  | PF03302.6  | 1.7E-52     | VSP              |
| Hypothetical protein                                    | GL50803_11557  |                    |                                                                                 |       |            | 61    | 123  | PB011995   | 0.00        | Pfam-B_11995     |
| Alpha-1 giardin                                         | GL50803_11654  | gb:ACQ58091.1      | Annexin A5 [Anoplopoloma fimbria]                                               | 57    | 0.000002   | 8     | 67   | PF00191.13 | 7.1E-09     | Annexin          |
| Kinase, NEK-frag                                        | GL50803_11775  | ref:XP_001198470.1 | PREDICTED: similar to ankyrin 2,3/unc44 [Strongylocentrotus purpuratus]         | 91    | 2E-15      | 169   | 282  | PF00069.18 | 0.0001      | Pkinase          |
| Hypothetical protein                                    | GL50803_11866  |                    |                                                                                 |       |            | 78    | 130  | PF00583.17 | 0.000089    | Acetyltransf_1   |
| Coatmer alpha subunit                                   | GL50803_11953  | ref:XP_660630.1    | hypothetical protein AN3026.2 [Aspergillus nidulans FGSC A4]                    | 342   | 2E-91      | 47    | 80   | PF00400.25 | 1.8E-11     | WD40             |
| Elongation factor 1-gamma                               | GL50803_12102  | ref:XP_002610271.1 | hypothetical protein BRAFLDRAFT_115434 [Branchiostoma floridae]                 | 110   | 3E-22      | 235   | 340  | PF00647.12 | 3.8E-30     | EF1G             |
| Hypothetical protein                                    | GL50803_12999  |                    |                                                                                 |       |            |       |      |            |             |                  |
| Vacuolar ATP synthase subunit d                         | GL50803_13000  | ref:NP_189513.1    | H+-transporting two-sector ATPase, putative [Arabidopsis thaliana]              | 167   | 2E-39      | 17    | 346  | PF01992.9  | 1.6E-32     | vATP-synt_AC39   |
| Hypothetical protein                                    | GL50803_13288  | gb:AAI24607.1      | Zgc:152917 [Danio rerio]                                                        | 56    | 0.00001    |       |      |            |             |                  |
| Hypothetical protein                                    | GL50803_13413  |                    |                                                                                 |       |            |       |      |            |             |                  |
| Translation elongation factor                           | GL50803_13561  | ref:XP_002407515.1 | elongation factor 1-beta [Ixodes scapularis]                                    | 140   | 1E-31      | 131   | 219  | PF00736.12 | 2.5E-28     | EF1_GNE          |
| Beta tubulin                                            | GL50803_136020 | gb:AAI53757.1      | LOC100037222 protein [Xenopus laevis]                                           | 921   | 0          | 3     | 222  | PF00091.18 | 7.4E-72     | Tubulin          |
| VSP                                                     | GL50803_137618 | ref:XP_001028021.1 | Protein kinase domain containing protein [Tetrahyena thermophila]               | 116   | 1E-23      | 455   | 853  | PF03302.6  | 1.2E-130    | VSP              |
| Hypothetical protein                                    | GL50803_137685 | ref:XP_002055439.1 | GJ18789 [Drosophila virilis]                                                    | 471   | e-130      | 15    | 674  | PF02516.7  | 9.1E-80     | STT3             |
| Hypothetical protein                                    | GL50803_137746 |                    |                                                                                 |       |            |       |      |            |             |                  |
| Hypothetical protein                                    | GL50803_13922  |                    |                                                                                 |       |            | 1     | 334  | PB001790   | 2.4E-33     | Pfam-B_1790      |
| Hypothetical protein                                    | GL50803_14164  | ref:XP_654729.1    | molybdenum cofactor sulfurase [Entamoeba histolytica HM-1:IMSS]                 | 401   | e-109      |       |      |            |             |                  |
| Molybdenum cofactor sulfurase                           | GL50803_14200  | ref:XP_001907166.1 | unnamed protein product [Podospira anserina]                                    | 113   | 3E-23      | 352   | 598  | PF00266.12 | 1.8E-20     | Aminotran_5      |
| Kinase, NEK                                             | GL50803_14223  | ref:XP_001907166.1 | unnamed protein product [Podospira anserina]                                    | 113   | 3E-23      | 19    | 271  | PF00069.18 | 1.6E-36     | Pkinase          |
| CXC-rich protein                                        | GL50803_14225  | gb:EFC39035.1      | predicted protein [Naegleria gruberi]                                           | 79    | 6E-12      | 53    | 246  | PB001790   | 0.0000034   | Pfam-B_1790      |
| Hypothetical protein                                    | GL50803_14278  |                    |                                                                                 |       |            |       |      |            |             |                  |
| Synaptobrevin-like protein                              | GL50803_14469  | ref:XP_002273961.1 | PREDICTED: hypothetical protein [Vitis vinifera]                                | 55    | 0.000009   | 150   | 234  | PF00957.14 | 2E-17       | Synaptobrevin    |
| Cysteine desulfurase                                    | GL50803_14519  | emb:CAL52881.1     | Cysteine desulfurase NFS1 (ISS) [Ostreococcus tauri]                            | 417   | e-114      | 2     | 394  | PF00266.12 | 1.3E-71     | Aminotran_5      |
| Chaperone protein DnaK HSP70                            | GL50803_14581  | ref:XP_001491913.1 | molecular chaperone DnaK [Rickettsia canadensis str. McKiel]                    | 464   | e-128      | 9     | 602  | PF00012.13 | 2.1E-162    | HSP70            |
| Hypothetical protein                                    | GL50803_14660  | ref:XP_002498711.1 | ZYROOG16786p [Zygosaccharomyces rouxii]                                         | 50    | 0.00006    | 18    | 116  | PF03179.8  | 1.6E-12     | V-ATPase_G       |
| Protein disulfide isomerase PDI3                        | GL50803_14670  | ref:XP_651032.1    | thioredoxin [Entamoeba histolytica HM-1:IMSS]                                   | 101   | 3E-20      | 19    | 114  | PF00085.13 | 0.00        | Thioredoxin      |
| HesB domain-containing protein                          | GL50803_14821  | ref:NP_001102748.1 | hypothetical protein LOC500694 [Rattus norvegicus]                              | 100   | 6E-20      | 18    | 103  | PF01521.13 | 2.2E-17     | Fe-S_biosyn      |
| Hypothetical protein                                    | GL50803_14845  |                    |                                                                                 |       |            |       |      |            |             |                  |
| Hypothetical protein                                    | GL50803_14939  |                    |                                                                                 |       |            |       |      |            |             |                  |
| Pyrophosphate-fructose 6-phosphate 1-phosphotransferase | GL50803_14993  | gb:AAL16943.1      | putative pyrophosphate-dependent phosphofructokinase [Hexamita inflata]         | 778   | 0          | 69    | 315  | PF00365.13 | 3.6E-21     | PFK              |
| Hypothetical protein                                    | GL50803_15084  |                    |                                                                                 |       |            |       |      |            |             |                  |
| Alpha-14 giardin                                        | GL50803_15097  | ref:NP_001079765.1 | hypothetical protein LOC379455 [Xenopus laevis]                                 | 93    | 5E-17      | 88    | 143  | PF00191.13 | 0.000000052 | Annexin          |
| NiFU-like protein                                       | GL50803_15196  | ref:ZP_02901680.1  | FeS cluster assembly scaffold IscU [Escherichia albertii TW07627]               | 184   | 5E-45      | 80    | 203  | PF01592.9  | 4.5E-45     | NiFU_N           |
| ERP3                                                    | GL50803_15204  | ref:XP_002492913.1 | Protein with similarity to Emp24p and Erv25p, member of the p24 family [P...    | 55    | 0.000005   | 17    | 201  | PF01105.17 | 3.6E-25     | EMP24_GP25L      |
| Peroxisome oxidin 1                                     | GL50803_16076  | gb:AAP33385.1      | thioredoxin peroxidase [Spiroplasma birkbeckii]                                 | 273   | 6E-72      | 161   | 196  | PF10417.2  | 0.000000045 | 1-cysPrx_C       |
| Coiled-coil protein                                     | GL50803_16152  |                    |                                                                                 |       |            | 263   | 535  | PF10174.2  | 0.000097    | Cast             |
| Hypothetical protein                                    | GL50803_16313  | emb:CAD98642.1     | conserved BRCA1 domain protein [Cryptosporidium parvum]                         | 296   | 4E-78      | 7     | 249  | PF06732.4  | 4.7E-81     | Pescadillo_N     |
| Protein 21.1                                            | GL50803_16354  | ref:XP_001829840.1 | hypothetical protein CC1G_06049 [Coprinopsis cinerea okayama7#130]              | 64    | 0.00000005 | 651   | 672  | PF00023.23 | 0.000025    | Ank              |
| Hypothetical protein                                    | GL50803_16424  | ref:XP_002006769.1 | G121251 [Drosophila mojavensis]                                                 | 50    | 0.0003     | 45    | 169  | PF10248.2  | 0.00031     | MIF1P            |
| Hypothetical protein                                    | GL50803_16430  |                    |                                                                                 |       |            |       |      |            |             |                  |
| Tenascin-37                                             | GL50803_16477  | gb:EFC46548.1      | hypothetical protein NAEGRDRAFT_79129 [Naegleria gruberi]                       | 117   | 3E-24      | 352   | 377  | PF07974.6  | 0.000018    | EGF_2            |
| Kinase, NEK                                             | GL50803_16824  | ref:XP_001180091.1 | PREDICTED: similar to ankyrin 2,3/unc44 [Strongylocentrotus purpuratus]         | 148   | 2E-33      | 17    | 288  | PF00069.18 | 1.4E-39     | Pkinase          |
| Tenascin-like                                           | GL50803_16833  | gb:EDL26779.1      | mCG134590, isoform CRA_b [Mus musculus]                                         | 98    | 3E-18      | 579   | 603  | PF07974.6  | 0.000039    | EGF_2            |
| Phosphatidate cytidyltransferase                        | GL50803_16906  | ref:XP_001631675.1 | predicted protein [Nematostella vectensis]                                      | 122   | 9E-26      | 29    | 373  | PF01148.13 | 1.1E-38     | CTP_transf_1     |
| FtsJ cell division protein, putative                    | GL50803_16993  | ref:XP_001259487.1 | rRNA methyltransferase Spb1, putative [Neosartorya fischeri NRRL 181]           | 323   | 5E-86      | 854   | 1054 | PF07780.5  | 4.8E-55     | Spb1_C           |
| Hypothetical protein                                    | GL50803_16998  | gb:EEE19788.1      | conserved hypothetical protein [Toxoplasma gondii GT1]                          | 112   | 1E-22      |       |      |            |             |                  |
| Bip                                                     | GL50803_17121  | sp:Q03684.1        | RecName: Full=Luminal-binding protein 4; Short=BIP 4; AltName: Full=78 I771     |       | 0          | 30    | 652  | PF00012.13 | 6.2E-232    | HSP70            |
| Hypothetical protein                                    | GL50803_17161  |                    |                                                                                 |       |            | 13    | 242  | PF01459.15 | 0.0000018   | Porin_3          |
| ABC transporter, ATP-binding protein                    | GL50803_17165  | ref:XP_001023593.1 | ABC transporter family protein [Tetrahyena thermophila]                         | 147   | 6E-33      | 623   | 733  | PF00005.20 | 0.00000045  | ABC_tran         |

| GiardiaDB r1.1                                |               | PSI BLAST          |                                                                                         |       |             | PFAM  |      |             |             |                  |
|-----------------------------------------------|---------------|--------------------|-----------------------------------------------------------------------------------------|-------|-------------|-------|------|-------------|-------------|------------------|
| Annotation                                    | Accession No. | ACCESSION          | DEFINITION                                                                              | Score | E-Value     | start | end  | ID No.      | E-value     | Protein families |
| Hypothetical protein                          | GL50803_17236 |                    |                                                                                         |       |             | 26    | 206  | PF07786.5   | 0.027       | DUF1624          |
| Protein 21.1                                  | GL50803_17288 | gb:EDL26002.1      | uveal autoantigen with coiled-coil d...                                                 | 53    | 0.0003      | 1596  | 1618 | PF00023.23  | 0.00048     | Ank              |
| Hypothetical protein                          | GL50803_17296 | ref:XP_001014709.1 | major facilitator superfamily protein [Tetrahymena thermophila]                         | 64    | 0.00000007  | 84    | 466  | PF07690.9   | 0.00        | MFS_1            |
| High cysteine membrane protein Group 2        | GL50803_17328 | ref:XP_976535.1    | hypothetical protein THERM_01178660 [Tetrahymena thermophila]                           | 404   | e-110       | 807   | 1127 | PF03302.6   | 2.5E-10     | VSP              |
| Hypothetical protein                          | GL50803_17342 | gb:ABI15615.1      | hypothetical protein [Spiroplasma bakhariense]                                          | 256   | 5E-66       | 2     | 192  | PB000845    | 8.1E-34     | Pfam-B_845       |
| TCP-1 chaperonin subunit gamma                | GL50803_17411 | gb:AAL35373.1      | CCT chaperonin gamma subunit [Physarum polycephalum]                                    | 565   | e-159       | 31    | 558  | PF00118.17  | 1.7E-142    | Cpn60_TCP1       |
| CXC-rich protein                              | GL50803_17476 | ref:XP_651577.2    | tyrosine kinase [Entamoeba histolytica HM-1:IMSS]                                       | 150   | 3E-33       | 955   | 1264 | PB001790    | 8.1E-30     | Pfam-B_1790      |
| Kinase, NEK                                   | GL50803_17510 | ref:XP_001649474.1 | ankyrin 2,3/unc44 [Aedes aegypti...]                                                    | 96    | 1E-17       | 30    | 282  | PF00069.18  | 4.6E-28     | Kinase           |
| Vacuolar proton-ATPase subunit, putative      | GL50803_18470 | ref:XP_570271.1    | vacuolar (H+)-ATPase subunit [Cryptococcus neoformans var. neoformans]                  | 424   | e-116       | 425   | 919  | PF01496.12  | 7.2E-139    | V_ATPase_I       |
| Hypothetical protein                          | GL50803_19230 |                    |                                                                                         |       |             | 42    | 115  | PF03656.6   | 0.0063      | Pam16            |
| Hypothetical protein                          | GL50803_1937  |                    |                                                                                         |       |             | 2     | 93   | PB004452    | 6.7E-20     | Pfam-B_4452      |
| Glutaredoxin-related protein                  | GL50803_2013  | ref:ZP_06171702.1  | glutaredoxin-like protein [Brevundimonas subvibrioides ATCC 15264]                      | 126   | 2E-27       | 115   | 179  | PF00462.17  | 8.1E-16     | Glutaredoxin     |
| Long chain fatty acid CoA ligase 5            | GL50803_21118 | ref:XP_001761279.1 | predicted protein [Physcomitrella patens subsp. patens]                                 | 206   | 7E-51       | 95    | 649  | PF00501.21  | 4.5E-80     | AMP-binding      |
| ABC transporter, ATP-binding protein          | GL50803_21411 | ref:XP_001032330.2 | ABC transporter family protein [Tetrahymena thermophila]                                | 146   | 2E-32       | 5     | 271  | PB002445    | 2.6E-18     | Pfam-B_2445      |
| Spindle pole protein, putative                | GL50803_21444 |                    |                                                                                         |       |             |       |      |             |             |                  |
| Hypothetical protein                          | GL50803_23389 | gb:EEE27081.1      | cAMP-specific phosphodiesterase, putative [Toxoplasma gondii GT1]                       | 53    | 0.0002      | 549   | 731  | PB015975    | 1.6E-64     | Pfam-B_15975     |
| Protein 21.1                                  | GL50803_23492 | ref:XP_001200736.1 | PREDICTED: similar to ankyrin 2,3/unc44, partial [Strongylocentrotus purp...]           | 192   | 1E-46       | 658   | 681  | PF00023.23  | 0.000031    | Ank              |
| Vacuolar protein sorting 35                   | GL50803_23833 | ref:XP_001179974.1 | PREDICTED: similar to vacuolar protein sorting 35, partial [Strongylocentrotus purp...] | 115   | 2E-23       | 169   | 349  | PF03635.10  | 6.1E-24     | Vps35            |
| [2Fe-2S] ferredoxin                           | GL50803_27266 | ref:ZP_01864211.1  | Ferredoxin, 2Fe-2S [Erythrobacter sp. SD-21]                                            | 80    | 6E-14       | 17    | 97   | PF00111.20  | 1.6E-10     | Fe2              |
| Multidrug resistance-associated protein 1     | GL50803_28379 | gb:ABI15579.1      | ATP-binding cassette subfamily C (CFTR/MRP) member 5 [Spiroplasma bakhariense]          | 652   | 0           | 900   | 1146 | PF00664.16  | 4E-18       | ABC_membrane     |
| Hypothetical protein                          | GL50803_28962 |                    |                                                                                         |       |             | 141   | 222  | PF02480.9   | 0.0000018   | Herpes_gE        |
| Hypothetical protein                          | GL50803_29327 | ref:XP_001746337.1 | hypothetical protein [Monosiga brevicollis MX1]                                         | 77    | 1E-12       | 18    | 170  | PF03357.14  | 8.4E-15     | Snf7             |
| Hypothetical protein                          | GL50803_29500 |                    |                                                                                         |       |             | 33    | 82   | PF00166.14  | 0.018       | Cpn10            |
| Hypothetical protein                          | GL50803_3021  |                    |                                                                                         |       |             |       |      |             |             |                  |
| hypothetical protein                          | GL50803_32999 | gb:EFA79563.1      | zipper-like domain-containing protein [Polysphondylium pallidum PN500]                  | 70    | 4E-10       | 91    | 173  | PB000039    | 0.000054    | Pfam-B_39        |
| ABC transporter family protein                | GL50803_3470  | ref:XP_001016586.1 | ABC transporter family protein [Tetrahymena thermophila]                                | 249   | 1E-63       | 801   | 922  | PF000005.20 | 3.9E-17     | ABC_tran         |
| Hypothetical protein                          | GL50803_3491  |                    |                                                                                         |       |             |       |      |             |             |                  |
| P24, putative                                 | GL50803_40244 |                    |                                                                                         |       |             | 8     | 94   | PF01105.17  | 0.000000036 | EMP24_GP25L      |
| Ciliary dynein heavy chain 11                 | GL50803_42285 | ref:XP_001634257.1 | predicted protein [Nematostella vectensis]                                              | 191   | 3E-45       | 2594  | 2895 | PF08393.6   | 3.9E-38     | DHC_N2           |
| Hypothetical protein                          | GL50803_4768  |                    |                                                                                         |       |             |       |      |             |             |                  |
| Kinase, NEK                                   | GL50803_5375  | dbj:BAA77339.1     | Nek2A [Xenopus laevis]                                                                  | 285   | 7E-75       | 37    | 299  | PF00069.18  | 4.7E-68     | Kinase           |
| Alpha-10 giardin                              | GL50803_5649  | pdb:1BC1           | Chain A, Recombinant Rat Annexin V, Quadruple Mutant (T72K, S144K, S259...)             | 5     | 0.00000008  | 51    | 99   | PF00191.13  | 0.00033     | Annexin          |
| Sec61-alpha                                   | GL50803_5744  | ref:XP_002285514.1 | PREDICTED: hypothetical protein [Vitis vinifera]                                        | 417   | e-114       | 93    | 479  | PF00344.13  | 1.5E-68     | SecY             |
| 14-3-3 protein                                | GL50803_6430  | gb:EFC43173.1      | predicted protein [Naegleria gruberi]                                                   | 323   | 8E-87       | 7     | 241  | PF00244.13  | 2.1E-104    | 14.3.2003        |
| Metal-dependent hydrolase                     | GL50803_6497  | ref:ZP_02962021.2  | hypothetical protein PROSTU_04109 [Providencia stuartii ATCC 25827]                     | 99    | 7E-19       | 27    | 79   | PF00753.20  | 0.00000066  | Lactamase_B      |
| Hypothetical protein                          | GL50803_6617  |                    |                                                                                         |       |             |       |      |             |             |                  |
| Zinc finger domain                            | GL50803_6733  | ref:XP_002007529.1 | GI12340 [Drosophila mojavensis]                                                         | 112   | 8E-23       | 129   | 177  | PF01529.13  | 2.5E-20     | zf-DHHC          |
| Ubiquitin                                     | GL50803_7110  | emb:CAI83757.1     | Polyubiquitin 4 [Polyplastron multivesiculatum]                                         | 144   | 2E-33       | 11    | 79   | PF00240.16  | 3.5E-34     | ubiquitin        |
| Kinase, NEK-frag                              | GL50803_7183  | ref:XP_001580653.1 | ankyrin repeat protein [Trichomonas vaginalis G3]                                       | 103   | 9E-20       | 59    | 266  | PF00069.18  | 1.7E-16     | Kinase           |
| Hypothetical protein                          | GL50803_7188  | ref:YP_656868.1    | halomucin [Haloquadratum walsbyi DSM 16790]                                             | 55    | 0.00006     | 6     | 329  | PB001790    | 6.5E-31     | Pfam-B_1790      |
| Vacuolar ATP synthase catalytic subunit A     | GL50803_7532  | sp:P48414.1        | RecName: Full=V-type proton ATPase catalytic subunit A; Short=V-ATPas                   | 627   | e-177       | 234   | 501  | PF00006.18  | 2.2E-96     | ATP-synt_ab      |
| Alpha-2 giardin                               | GL50803_7796  | gb:AAL25093.1      | annexin [Artemia franciscana]                                                           | 57    | 0.0000002   | 18    | 67   | PF00191.13  | 0.000000052 | Annexin          |
| Protein disulfide isomerase PDI5              | GL50803_8064  | gb:EEH57167.1      | predicted protein [Micromonas pusilla CCMP1545]                                         | 115   | 2E-24       | 37    | 132  | PF00085.13  | 3.1E-31     | Thioredoxin      |
| Manganese-dependent inorganic pyrophosphatase | GL50803_8163  | ref:YP_900441.1    | putative manganese-dependent inorganic pyrophosphatase [Pelobacter pr...                | 176   | 1E-41       | 37    | 515  | PF01368.13  | 5.6E-22     | DHH              |
| Vacuolar ATP synthase 16 kDa proteolipid      | GL50803_8559  | gb:EEY61709.1      | V-type proton ATPase 16 kDa proteolipid subunit, putative [Phytophthora ir...           | 174   | 4E-42       | 97    | 162  | PF00137.14  | 1.5E-20     | ATP-synt_C       |
| Coiled-coil protein                           | GL50803_8564  |                    |                                                                                         |       |             | 642   | 699  | PF10211.2   | 0.0034      | Ax_dynein_light  |
| Kinase, AGC NDR                               | GL50803_8587  |                    |                                                                                         |       |             | 74    | 237  | PF00069.18  | 8.9E-33     | Kinase           |
| Suppressor of actin 1                         | GL50803_8589  | ref:XP_964812.1    | hypothetical protein NCU00896 [Neurospora crassa OR74A]                                 | 120   | 4E-25       | 53    | 336  | PF02383.11  | 6.2E-44     | Syja_N           |
| Protein 21.1                                  | GL50803_86855 | ref:ZP_01618981.1  | hypothetical protein L8106_01562...                                                     | 62    | 0.00000004  | 899   | 949  | PF04102.5   | 0.00059     | SlyX             |
| ABC transporter family protein                | GL50803_87446 | ref:XP_001846619.1 | ATP-binding cassette sub-family A member 3 [Culex quinquefasciatus]                     | 153   | 1E-34       | 664   | 769  | PF000005.20 | 7E-16       | ABC_tran         |
| Kinase, SCY1                                  | GL50803_8805  | ref:XP_797681.1    | PREDICTED: similar to SCY1-like 2 protein, partial [Strongylocentrotus purp...]         | 83    | 2E-13       | 756   | 834  | PB000079    | 0.0000048   | Pfam-B_79        |
| Protein 21.1                                  | GL50803_88245 | ref:XP_001329422.1 | ankyrin repeat protein [Trichomonas vaginalis G3]                                       | 308   | 4E-81       | 382   | 402  | PF00023.23  | 0.00017     | Ank              |
| Cytosolic HSP70                               | GL50803_88765 | gb:AAO8152.1       | cytosolic heat shock protein 70 [Spiroplasma bakhariense]                               | 890   | 0           | 6     | 615  | PF00012.13  | 3.7E-249    | HSP70            |
| Copine I                                      | GL50803_8903  | gb:EFA85793.1      | hypothetical protein PPL_01023 [Polysphondylium pallidum PN500]                         | 215   | 4E-54       | 50    | 189  | PF07002.9   | 1.2E-32     | Copine           |
| Long chain fatty acid CoA ligase 5            | GL50803_9062  | gb:ABA96461.2      | AMP-binding enzyme family protein, expressed [Oryza sativa (japonica cul...             | 312   | 1E-82       | 360   | 688  | PF00501.21  | 1.7E-65     | AMP-binding      |
| High cysteine membrane protein Group 2        | GL50803_91099 | gb:AAH71562.2      | NOTCH2 protein [Homo sapiens]                                                           | 83    | 3E-13       | 538   | 561  | PF000008.20 | 0.00085     | EGF              |
| Hypothetical protein                          | GL50803_9296  |                    |                                                                                         |       |             |       |      |             |             |                  |
| Dynein heavy chain                            | GL50803_93736 | ref:XP_828326.1    | dynein heavy chain [Trypanosoma brucei TREU927]                                         | 452   | e-124       | 201   | 621  | PB001786    | 1.9E-116    | Pfam-B_1786      |
| Spastin                                       | GL50803_94322 | ref:XP_002572778.1 | hypothetical protein [Schistosoma mansoni]                                              | 123   | 1E-25       | 784   | 857  | PF00004.22  | 3.7E-10     | AAA              |
| Hypothetical protein                          | GL50803_94658 | ref:XP_002186415.1 | predicted protein [Phaeoactyllum tricornutum CCAP 1055/1]                               | 74    | 6E-11       | 252   | 515  | PF05021.8   | 8.5E-13     | NPL4             |
| Alpha mitochondrial protein peptidase like 1  | GL50803_9478  | ref:ZP_05534614.1  | protease [Streptomyces viridochromogenes DSM 40736]                                     | 60    | 0.00000004  | 13    | 149  | PF00675.13  | 7.6E-10     | Peptidase_M16    |
| Hypothetical protein                          | GL50803_9503  | ref:YP_002008055.1 | putative hydrolase or acyltransferase [Cupriavidus taiwanensis]                         | 63    | 0.000000003 | 71    | 303  | PF00561.13  | 1E-11       | Abhydrolase_1    |
| Coiled-coil protein                           | GL50803_9515  | ref:XP_001309423.1 | hypothetical protein [Trichomonas vaginalis G3]                                         | 68    | 0.000000008 |       |      |             |             |                  |
| Potassium-transporting ATPase alpha chain     | GL50803_96670 | ref:NP_001117930.1 | Na/K ATPase alpha subunit isoform 2 [Onchocynchus mykiss]                               | 661   | 0           | 222   | 454  | PF00122.13  | 6.4E-58     | E1-E2_ATPase     |
| NADH oxidase                                  | GL50803_9719  | ref:YP_001713634.1 | putative oxidoreductase, FAD/FMN-binding [Acinetobacter baumannii AYE...                | 132   | 6E-29       | 14    | 215  | PF00724.13  | 0.00000015  | Oxidored_FMN     |
| Chaperone protein dnaJ                        | GL50803_9751  | ref:XP_952078.1    | hypothetical protein [Thelateria annulata strain Ankara]                                | 67    | 0.000000002 | 264   | 317  | PF00226.24  | 1.7E-15     | DnaJ             |
| Hypothetical protein                          | GL50803_9780  |                    |                                                                                         |       |             | 9     | 89   | PF08400.3   | 0.022       | phage_tail_N     |
| Hypothetical protein                          | GL50803_9861  |                    |                                                                                         |       |             |       |      |             |             |                  |
