# Supplementary material for: The Minimal Proteome in the Reduced Mitochondrion of the Parasitic Protist Giardia intestinalis
Source: PubMed Central journal article supplement (PMC3044749; doi:10.1371/journal.pone.0017285), 2011-02-24
Supplement: pone.0017285.s012.pdf [file pone.0017285.s012.pdf]

**Table S3. Identification of protein families using PfamA+B databases.**

| GiardiaDB r1.1<br>accession No. | PFAM A+B identification (cut off 0.05) |      | ID No.     | E-value   | Protein families |
|---------------------------------|----------------------------------------|------|------------|-----------|------------------|
|                                 | start                                  | end  |            |           |                  |
| GL50803_10016                   | 38                                     | 125  | PF09794.2  | 2.20E-02  | Avl9             |
| GL50803_10016                   | 154                                    | 230  | PF00085.13 | 1.10E-03  | Thioredoxin      |
| GL50803_102101                  | 11                                     | 351  | PF00225.16 | 0,00      | Kinesin          |
| GL50803_102101                  | 591                                    | 829  | PB004124   | 2.60E-73  | Pfam-B_4124      |
| GL50803_103891                  | 25                                     | 535  | PF00118.17 | 1.90E-101 | Cpn60_TCP1       |
| GL50803_113656                  | 168                                    | 208  | PF00112.16 | 3.90E-07  | Peptidase_C1     |
| GL50803_113656                  | 449                                    | 518  | PF00112.16 | 2.00E-19  | Peptidase_C1     |
| GL50803_113892                  | 79                                     | 642  | PF00501.21 | 1.50E-80  | AMP-binding      |
| GL50803_113892                  | 660                                    | 745  | PB001299   | 2.40E-04  | Pfam-B_1299      |
| GL50803_114042                  | 405                                    | 607  | PF03302.6  | 0,00      | VSP              |
| GL50803_114042                  | 778                                    | 810  | PF03302.6  | 2.20E-07  | VSP              |
| GL50803_114042                  | 778                                    | 805  | PF08693.3  | 1.80E-02  | SKG6             |
| GL50803_114777                  | 2                                      | 192  | PB000845   | 1.40E-33  | Pfam-B_845       |
| GL50803_114777                  | 215                                    | 537  | PF07690.9  | 5.90E-25  | MFS_1            |
| GL50803_11775                   | 169                                    | 282  | PF00069.18 | 1.00E-04  | Pkinase          |
| GL50803_11775                   | 1250                                   | 1275 | PF00023.23 | 3.90E-04  | Ank              |
| GL50803_11775                   | 1429                                   | 1452 | PF00023.23 | 4.60E-02  | Ank              |
| GL50803_11775                   | 1472                                   | 1491 | PF00023.23 | 1.30E-02  | Ank              |
| GL50803_11775                   | 1502                                   | 1524 | PF00023.23 | 3.30E-03  | Ank              |
| GL50803_11866                   | 78                                     | 130  | PF00583.17 | 8.90E-05  | Acetyltransf_1   |
| GL50803_11953                   | 47                                     | 80   | PF00400.25 | 1.80E-11  | WD40             |
| GL50803_11953                   | 85                                     | 123  | PF00400.25 | 2.80E-11  | WD40             |
| GL50803_11953                   | 130                                    | 165  | PF00400.25 | 7.60E-09  | WD40             |
| GL50803_11953                   | 198                                    | 231  | PF00400.25 | 9.50E-07  | WD40             |
| GL50803_11953                   | 648                                    | 869  | PF04053.7  | 2.10E-08  | Coatomer_WDAD    |
| GL50803_11953                   | 1069                                   | 1272 | PF06957.4  | 1.10E-10  | COPI_C           |
| GL50803_12102                   | 106                                    | 180  | PF00043.18 | 5.70E-06  | GST_C            |
| GL50803_12102                   | 235                                    | 340  | PF00647.12 | 3.80E-30  | EF1G             |
| GL50803_137685                  | 15                                     | 674  | PF02516.7  | 9.10E-80  | STT3             |
| GL50803_14200                   | 130                                    | 248  | PF00266.12 | 2.00E-06  | Aminotran_5      |
| GL50803_14200                   | 352                                    | 598  | PF00266.12 | 1.80E-20  | Aminotran_5      |
| GL50803_14223                   | 19                                     | 271  | PF00069.18 | 1.60E-36  | Pkinase          |
| GL50803_14519                   | 2                                      | 394  | PF00266.12 | 1.30E-71  | Aminotran_5      |
| GL50803_14581                   | 9                                      | 602  | PF00012.13 | 2.10E-162 | HSP70            |
| GL50803_14670                   | 19                                     | 114  | PF00085.13 | 0,00      | Thioredoxin      |
| GL50803_14821                   | 18                                     | 103  | PF01521.13 | 2.20E-17  | Fe-S_biosyn      |
| GL50803_15196                   | 80                                     | 203  | PF01592.9  | 4.50E-45  | NifU_N           |
| GL50803_15204                   | 17                                     | 201  | PF01105.17 | 3.60E-25  | EMP24_GP25L      |
| GL50803_15889                   | 85                                     | 259  | PF00953.14 | 3.70E-29  | Glycos_transf_4  |
| GL50803_16152                   | 263                                    | 535  | PF10174.2  | 9.70E-05  | Cast             |
| GL50803_16313                   | 7                                      | 249  | PF06732.4  | 4.70E-81  | Pescadillo_N     |
| GL50803_16354                   | 38                                     | 62   | PF00023.23 | 4.60E-03  | Ank              |
| GL50803_16354                   | 69                                     | 90   | PF00023.23 | 3.10E-02  | Ank              |
| GL50803_16354                   | 614                                    | 636  | PF00023.23 | 1.90E-02  | Ank              |
| GL50803_16354                   | 651                                    | 672  | PF00023.23 | 2.50E-05  | Ank              |
| GL50803_16833                   | 85                                     | 110  | PF07974.6  | 3.80E-02  | EGF_2            |
| GL50803_16833                   | 134                                    | 164  | PF07974.6  | 2.40E-02  | EGF_2            |
| GL50803_16833                   | 187                                    | 219  | PF07974.6  | 3.90E-02  | EGF_2            |
| GL50803_16833                   | 224                                    | 261  | PF07974.6  | 5.50E-03  | EGF_2            |
| GL50803_16833                   | 579                                    | 603  | PF07974.6  | 3.90E-05  | EGF_2            |
| GL50803_16906                   | 29                                     | 373  | PF01148.13 | 1.10E-38  | CTP_transf_1     |
| GL50803_16993                   | 25                                     | 201  | PF01728.12 | 6.80E-54  | FtsJ             |
| GL50803_16993                   | 257                                    | 304  | PF11861.1  | 3.30E-03  | DUF3381          |
| GL50803_16993                   | 306                                    | 460  | PF11861.1  | 6.10E-29  | DUF3381          |
| GL50803_16993                   | 854                                    | 1054 | PF07780.5  | 4.80E-55  | Spb1_C           |
| GL50803_17161                   | 13                                     | 242  | PF01459.15 | 1.80E-06  | Porin_3          |
| GL50803_17296                   | 84                                     | 466  | PF07690.9  | 0,00      | MFS_1            |
| GL50803_17342                   | 2                                      | 192  | PB000845   | 8.10E-34  | Pfam-B_845       |

| GiardiaDB r1.1<br>accession No. | PFAM A+B identification (cut off 0.05) |     | ID No.     | E-value  | Protein families |
|---------------------------------|----------------------------------------|-----|------------|----------|------------------|
|                                 | start                                  | end |            |          |                  |
| GL50803_17342                   | 215                                    | 516 | PF07690.9  | 1.30E-17 | MFS_1            |
| GL50803_17510                   | 30                                     | 282 | PF00069.18 | 4.60E-28 | Pkinase          |
| GL50803_17510                   | 279                                    | 407 | PF08317.4  | 5.40E-04 | Spc7             |
| GL50803_17510                   | 297                                    | 409 | PF10473.2  | 4.00E-04 | Cenp-F_leu_zip   |
| GL50803_17510                   | 301                                    | 377 | PF04582.5  | 3.90E-03 | Reo_sigmaC       |
| GL50803_17510                   | 455                                    | 474 | PF00023.23 | 2.70E-03 | Ank              |
| GL50803_17510                   | 481                                    | 502 | PF00023.23 | 3.30E-04 | Ank              |
| GL50803_17510                   | 523                                    | 545 | PF00023.23 | 4.90E-02 | Ank              |
| GL50803_17510                   | 554                                    | 575 | PF00023.23 | 8.80E-04 | Ank              |
| GL50803_17510                   | 586                                    | 610 | PF00023.23 | 2.20E-04 | Ank              |
| GL50803_17510                   | 615                                    | 637 | PF00023.23 | 1.10E-03 | Ank              |
| GL50803_19230                   | 42                                     | 115 | PF03656.6  | 6.30E-03 | Pam16            |
| GL50803_2013                    | 115                                    | 179 | PF00462.17 | 8.10E-16 | Glutaredoxin     |
| GL50803_21118                   | 95                                     | 649 | PF00501.21 | 4.50E-80 | AMP-binding      |
| GL50803_21118                   | 673                                    | 752 | PB001299   | 2.10E-04 | Pfam-B_1299      |
| GL50803_23389                   | 549                                    | 731 | PB015975   | 1.60E-64 | Pfam-B_15975     |
| GL50803_23389                   | 576                                    | 614 | PF04513.5  | 4.20E-02 | Baculo_PEP_C     |
| GL50803_23389                   | 851                                    | 998 | PF00233.12 | 2.20E-05 | PDEase_I         |
| GL50803_27266                   | 17                                     | 97  | PF00111.20 | 1.60E-10 | Fer2             |
| GL50803_29500                   | 33                                     | 82  | PF00166.14 | 1.80E-02 | Cpn10            |
| GL50803_3470                    | 382                                    | 628 | PB009274   | 1.50E-12 | Pfam-B_9274      |
| GL50803_3470                    | 382                                    | 625 | PB001165   | 5.10E-10 | Pfam-B_1165      |
| GL50803_3470                    | 801                                    | 922 | PF00005.20 | 3.90E-17 | ABC_tran         |
| GL50803_3470                    | 880                                    | 978 | PB000817   | 6.30E-07 | Pfam-B_817       |
| GL50803_40244                   | 8                                      | 94  | PF01105.17 | 3.60E-08 | EMP24_GP25L      |
| GL50803_40244                   | 11                                     | 91  | PF05134.6  | 2.30E-02 | Gspl             |
| GL50803_40244                   | 22                                     | 58  | PF07756.5  | 1.70E-02 | DUF1612          |
| GL50803_5375                    | 37                                     | 299 | PF00069.18 | 4.70E-68 | Pkinase          |
| GL50803_5375                    | 333                                    | 383 | PB008998   | 7.50E-04 | Pfam-B_8998      |
| GL50803_5375                    | 358                                    | 389 | PF12072.1  | 6.10E-03 | DUF3552          |
| GL50803_5744                    | 58                                     | 92  | PF10559.2  | 3.20E-13 | Plug_translocon  |
| GL50803_5744                    | 93                                     | 479 | PF00344.13 | 1.50E-68 | SecY             |
| GL50803_7183                    | 59                                     | 266 | PF00069.18 | 1.70E-16 | Pkinase          |
| GL50803_7183                    | 380                                    | 401 | PF00023.23 | 4.00E-02 | Ank              |
| GL50803_7183                    | 645                                    | 667 | PF00023.23 | 2.30E-03 | Ank              |
| GL50803_7183                    | 708                                    | 731 | PF00023.23 | 3.90E-03 | Ank              |
| GL50803_7188                    | 6                                      | 329 | PB001790   | 6.50E-31 | Pfam-B_1790      |
| GL50803_7188                    | 324                                    | 690 | PB001790   | 0,00     | Pfam-B_1790      |
| GL50803_8064                    | 2                                      | 43  | PF10318.2  | 3.70E-02 | 7TM_GPCR_Srh     |
| GL50803_8064                    | 37                                     | 132 | PF00085.13 | 3.10E-31 | Thioredoxin      |
| GL50803_8163                    | 37                                     | 515 | PF01368.13 | 5.60E-22 | DHH              |
| GL50803_8163                    | 112                                    | 157 | PF00571.21 | 3.50E-06 | CBS              |
| GL50803_8163                    | 388                                    | 431 | PF00571.21 | 1.30E-03 | CBS              |
| GL50803_8163                    | 550                                    | 685 | PF02833.7  | 2.00E-08 | DHHA2            |
| GL50803_8587                    | 74                                     | 237 | PF00069.18 | 8.90E-33 | Pkinase          |
| GL50803_8587                    | 287                                    | 391 | PF00069.18 | 9.10E-18 | Pkinase          |
| GL50803_86855                   | 67                                     | 89  | PF00023.23 | 2.00E-03 | Ank              |
| GL50803_86855                   | 97                                     | 123 | PF00023.23 | 2.00E-03 | Ank              |
| GL50803_86855                   | 807                                    | 952 | PF08614.4  | 5.90E-03 | ATG16            |
| GL50803_86855                   | 899                                    | 949 | PF04102.5  | 5.90E-04 | SlyX             |
| GL50803_87446                   | 664                                    | 769 | PF00005.20 | 7.00E-16 | ABC_tran         |
| GL50803_8805                    | 751                                    | 825 | PB018484   | 1.30E-04 | Pfam-B_18484     |
| GL50803_8805                    | 756                                    | 834 | PB000079   | 4.80E-06 | Pfam-B_79        |
| GL50803_88245                   | 37                                     | 61  | PF00023.23 | 2.30E-02 | Ank              |
| GL50803_88245                   | 351                                    | 376 | PF00023.23 | 3.50E-02 | Ank              |
| GL50803_88245                   | 382                                    | 402 | PF00023.23 | 1.70E-04 | Ank              |
| GL50803_88245                   | 473                                    | 495 | PF00023.23 | 7.20E-03 | Ank              |
| GL50803_88245                   | 597                                    | 619 | PF00023.23 | 3.60E-03 | Ank              |
| GL50803_88245                   | 627                                    | 649 | PF00023.23 | 1.50E-03 | Ank              |

| GiardiaDB r1.1<br>accession No. | PFAM A+B identification (cut off 0.05) |      |            |          |                  |
|---------------------------------|----------------------------------------|------|------------|----------|------------------|
|                                 | start                                  | end  | ID No.     | E-value  | Protein families |
| GL50803_88245                   | 658                                    | 681  | PF00023.23 | 2.20E-03 | Ank              |
| GL50803_88245                   | 690                                    | 709  | PF00023.23 | 3.20E-02 | Ank              |
| GL50803_88245                   | 752                                    | 774  | PF00023.23 | 4.60E-02 | Ank              |
| GL50803_88245                   | 783                                    | 803  | PF00023.23 | 5.40E-03 | Ank              |
| GL50803_88245                   | 930                                    | 954  | PF00023.23 | 3.10E-02 | Ank              |
| GL50803_88245                   | 960                                    | 986  | PF00023.23 | 1.60E-03 | Ank              |
| GL50803_9062                    | 74                                     | 196  | PF00501.21 | 3.30E-23 | AMP-binding      |
| GL50803_9062                    | 360                                    | 688  | PF00501.21 | 1.70E-65 | AMP-binding      |
| GL50803_9062                    | 698                                    | 803  | PB001299   | 9.70E-10 | Pfam-B_1299      |
| GL50803_9062                    | 744                                    | 808  | PB000908   | 6.10E-07 | Pfam-B_908       |
| GL50803_9062                    | 745                                    | 809  | PB016442   | 4.60E-06 | Pfam-B_16442     |
| GL50803_91099                   | 164                                    | 191  | PF07974.6  | 4.40E-03 | EGF_2            |
| GL50803_91099                   | 434                                    | 458  | PF07974.6  | 4.30E-02 | EGF_2            |
| GL50803_91099                   | 538                                    | 561  | PF00008.20 | 8.50E-04 | EGF              |
| GL50803_91099                   | 695                                    | 723  | PF07974.6  | 2.30E-03 | EGF_2            |
| GL50803_91099                   | 754                                    | 777  | PF07974.6  | 1.60E-02 | EGF_2            |
| GL50803_91099                   | 962                                    | 993  | PF07974.6  | 7.30E-03 | EGF_2            |
| GL50803_91099                   | 1216                                   | 1239 | PF00008.20 | 2.00E-02 | EGF              |
| GL50803_91099                   | 1313                                   | 1337 | PF07974.6  | 5.90E-03 | EGF_2            |
| GL50803_94322                   | 617                                    | 640  | PF01391.11 | 1.60E-02 | Collagen         |
| GL50803_94322                   | 784                                    | 857  | PF00004.22 | 3.70E-10 | AAA              |
| GL50803_94658                   | 2                                      | 81   | PF11543.1  | 6.50E-08 | UN_NPL4          |
| GL50803_94658                   | 252                                    | 515  | PF05021.8  | 8.50E-13 | NPL4             |
| GL50803_9478                    | 13                                     | 149  | PF00675.13 | 7.60E-10 | Peptidase_M16    |
| GL50803_9719                    | 14                                     | 215  | PF00724.13 | 1.50E-07 | Oxidored_FMN     |
| GL50803_9719                    | 225                                    | 344  | PF00724.13 | 8.60E-05 | Oxidored_FMN     |
| GL50803_9719                    | 300                                    | 375  | PF00189.13 | 1.20E-02 | Ribosomal_S3_C   |
| GL50803_9751                    | 264                                    | 317  | PF00226.24 | 1.70E-15 | DnaJ             |
| GL50803_10330                   | 15                                     | 61   | PF01683.11 | 2.70E-04 | EB               |
| GL50803_10330                   | 24                                     | 67   | PF01826.10 | 1.70E-04 | TIL              |
| GL50803_10330                   | 37                                     | 56   | PF07974.6  | 1.40E-02 | EGF_2            |
| GL50803_10330                   | 120                                    | 146  | PF07974.6  | 3.80E-03 | EGF_2            |
| GL50803_10330                   | 227                                    | 251  | PF07974.6  | 6.90E-04 | EGF_2            |
| GL50803_103454                  | 14                                     | 123  | PF03302.6  | 6.80E-09 | VSP              |
| GL50803_103454                  | 112                                    | 230  | PF03302.6  | 8.30E-04 | VSP              |
| GL50803_103454                  | 237                                    | 376  | PF03302.6  | 1.40E-03 | VSP              |
| GL50803_103454                  | 334                                    | 717  | PF03302.6  | 3.20E-38 | VSP              |
| GL50803_103454                  | 679                                    | 721  | PB016930   | 5.80E-07 | Pfam-B_16930     |
| GL50803_103454                  | 689                                    | 714  | PF08693.3  | 3.40E-03 | SKG6             |
| GL50803_112079                  | 3                                      | 225  | PF00091.18 | 0,00     | Tubulin          |
| GL50803_112079                  | 263                                    | 392  | PF03953.10 | 2.40E-51 | Tubulin_C        |
| GL50803_112312                  | 5                                      | 216  | PF00009.20 | 6.60E-56 | GTP_EFTU         |
| GL50803_112312                  | 249                                    | 315  | PF03144.18 | 2.10E-16 | GTP_EFTU_D2      |
| GL50803_112312                  | 324                                    | 430  | PF03143.10 | 1.40E-28 | GTP_EFTU_D3      |
| GL50803_11237                   | 230                                    | 427  | PB011818   | 3.70E-49 | Pfam-B_11818     |
| GL50803_11359                   | 3                                      | 40   | PF08071.5  | 1.00E-18 | RS4NT            |
| GL50803_11359                   | 47                                     | 89   | PF01479.18 | 2.00E-05 | S4               |
| GL50803_11359                   | 95                                     | 169  | PF00900.13 | 3.40E-29 | Ribosomal_S4e    |
| GL50803_11359                   | 178                                    | 201  | PF00467.22 | 1.20E-03 | KOW              |
| GL50803_11470                   | 68                                     | 209  | PF03302.6  | 3.30E-03 | VSP              |
| GL50803_11470                   | 213                                    | 299  | PF03302.6  | 1.70E-05 | VSP              |
| GL50803_11470                   | 346                                    | 534  | PF03302.6  | 3.10E-26 | VSP              |
| GL50803_11470                   | 532                                    | 673  | PF03302.6  | 2.10E-50 | VSP              |
| GL50803_11470                   | 622                                    | 661  | PF05808.4  | 1.30E-02 | Podoplanin       |
| GL50803_11470                   | 622                                    | 668  | PB016930   | 3.90E-04 | Pfam-B_16930     |
| GL50803_11470                   | 624                                    | 663  | PB020000   | 1.40E-04 | Pfam-B_20000     |
| GL50803_11521                   | 16                                     | 184  | PF03302.6  | 9.20E-06 | VSP              |
| GL50803_11521                   | 171                                    | 257  | PF03302.6  | 1.50E-05 | VSP              |
| GL50803_11521                   | 308                                    | 491  | PF03302.6  | 9.20E-30 | VSP              |

| GiardiaDB r1.1<br>accession No. | PFAM A+B identification (cut off 0.05) |      | ID No.     | E-value   | Protein families |
|---------------------------------|----------------------------------------|------|------------|-----------|------------------|
|                                 | start                                  | end  |            |           |                  |
| GL50803_11521                   | 487                                    | 628  | PF03302.6  | 1.70E-52  | VSP              |
| GL50803_11521                   | 561                                    | 618  | PB020000   | 2.60E-06  | Pfam-B_20000     |
| GL50803_11521                   | 570                                    | 615  | PF05808.4  | 3.80E-02  | Podoplanin       |
| GL50803_11521                   | 584                                    | 625  | PB016930   | 1.50E-04  | Pfam-B_16930     |
| GL50803_11557                   | 61                                     | 123  | PB011995   | 0,00      | Pfam-B_11995     |
| GL50803_13561                   | 7                                      | 162  | PB001387   | 1.40E-16  | Pfam-B_1387      |
| GL50803_13561                   | 95                                     | 122  | PF10587.2  | 2.70E-08  | EF-1_beta_acid   |
| GL50803_13561                   | 131                                    | 219  | PF00736.12 | 2.50E-28  | EF1_GNE          |
| GL50803_136020                  | 3                                      | 222  | PF00091.18 | 7.40E-72  | Tubulin          |
| GL50803_136020                  | 261                                    | 382  | PF03953.10 | 2.10E-48  | Tubulin_C        |
| GL50803_13922                   | 1                                      | 334  | PB001790   | 2.40E-33  | Pfam-B_1790      |
| GL50803_13922                   | 326                                    | 546  | PB001790   | 0,00      | Pfam-B_1790      |
| GL50803_14469                   | 150                                    | 234  | PF00957.14 | 2.00E-17  | Synaptobrevin    |
| GL50803_14469                   | 174                                    | 232  | PF02009.9  | 1.60E-02  | Rifin_STEVOR     |
| GL50803_14469                   | 192                                    | 238  | PF08412.3  | 4.20E-02  | Ion_trans_N      |
| GL50803_14660                   | 9                                      | 115  | PF03710.8  | 2.00E-02  | GlnE             |
| GL50803_14660                   | 18                                     | 116  | PF03179.8  | 1.60E-12  | V-ATPase_G       |
| GL50803_14993                   | 69                                     | 315  | PF00365.13 | 3.60E-21  | PFK              |
| GL50803_15097                   | 31                                     | 78   | PF00191.13 | 8.80E-05  | Annexin          |
| GL50803_15097                   | 88                                     | 143  | PF00191.13 | 5.20E-08  | Annexin          |
| GL50803_15097                   | 171                                    | 226  | PF00191.13 | 1.50E-03  | Annexin          |
| GL50803_16076                   | 6                                      | 140  | PF00578.14 | 0,00      | AhpC-TSA         |
| GL50803_16076                   | 161                                    | 196  | PF10417.2  | 4.50E-08  | 1-cysPrx_C       |
| GL50803_16424                   | 45                                     | 169  | PF10248.2  | 3.10E-04  | Mif1IP           |
| GL50803_16477                   | 114                                    | 140  | PF00008.20 | 1.10E-03  | EGF              |
| GL50803_16477                   | 217                                    | 240  | PF07974.6  | 4.90E-03  | EGF_2            |
| GL50803_16477                   | 352                                    | 377  | PF07974.6  | 1.80E-05  | EGF_2            |
| GL50803_16477                   | 457                                    | 480  | PF07974.6  | 3.00E-04  | EGF_2            |
| GL50803_16477                   | 554                                    | 578  | PF07974.6  | 4.00E-02  | EGF_2            |
| GL50803_16824                   | 17                                     | 288  | PF00069.18 | 1.40E-39  | Pkinase          |
| GL50803_16824                   | 415                                    | 437  | PF00023.23 | 2.00E-05  | Ank              |
| GL50803_16824                   | 451                                    | 471  | PF00023.23 | 3.60E-03  | Ank              |
| GL50803_16824                   | 512                                    | 530  | PF00023.23 | 1.20E-03  | Ank              |
| GL50803_16824                   | 610                                    | 632  | PF00023.23 | 6.20E-03  | Ank              |
| GL50803_16824                   | 640                                    | 664  | PF00023.23 | 9.90E-04  | Ank              |
| GL50803_16824                   | 683                                    | 702  | PF00023.23 | 4.70E-03  | Ank              |
| GL50803_16824                   | 712                                    | 732  | PF00023.23 | 2.70E-04  | Ank              |
| GL50803_16824                   | 745                                    | 775  | PF00023.23 | 3.80E-03  | Ank              |
| GL50803_17121                   | 30                                     | 652  | PF00012.13 | 6.20E-232 | HSP70            |
| GL50803_17121                   | 542                                    | 651  | PB002482   | 1.60E-05  | Pfam-B_2482      |
| GL50803_17165                   | 623                                    | 733  | PF00005.20 | 4.50E-07  | ABC_tran         |
| GL50803_17236                   | 26                                     | 206  | PF07786.5  | 2.70E-02  | DUF1624          |
| GL50803_17288                   | 1596                                   | 1618 | PF00023.23 | 4.80E-04  | Ank              |
| GL50803_17288                   | 1718                                   | 1741 | PF00023.23 | 9.30E-03  | Ank              |
| GL50803_17288                   | 1754                                   | 1773 | PF00023.23 | 2.10E-02  | Ank              |
| GL50803_17288                   | 1790                                   | 1808 | PF00023.23 | 8.90E-04  | Ank              |
| GL50803_17328                   | 807                                    | 1127 | PF03302.6  | 2.50E-10  | VSP              |
| GL50803_17411                   | 31                                     | 558  | PF00118.17 | 1.70E-142 | Cpn60_TCP1       |
| GL50803_17476                   | 21                                     | 279  | PB001790   | 1.00E-08  | Pfam-B_1790      |
| GL50803_17476                   | 955                                    | 1264 | PB001790   | 8.10E-30  | Pfam-B_1790      |
| GL50803_17476                   | 1780                                   | 2001 | PF03302.6  | 3.50E-10  | VSP              |
| GL50803_17476                   | 1996                                   | 2051 | PF03302.6  | 1.50E-03  | VSP              |
| GL50803_18470                   | 29                                     | 392  | PF01496.12 | 1.20E-15  | V_ATPase_I       |
| GL50803_18470                   | 425                                    | 919  | PF01496.12 | 7.20E-139 | V_ATPase_I       |
| GL50803_1937                    | 2                                      | 93   | PB004452   | 6.70E-20  | Pfam-B_4452      |
| GL50803_23492                   | 440                                    | 462  | PF00023.23 | 8.00E-05  | Ank              |
| GL50803_23492                   | 503                                    | 525  | PF00023.23 | 7.90E-04  | Ank              |
| GL50803_23492                   | 535                                    | 554  | PF00023.23 | 2.00E-04  | Ank              |
| GL50803_23492                   | 565                                    | 587  | PF00023.23 | 2.40E-03  | Ank              |

| GiardiaDB r1.1<br>accession No. | PFAM A+B identification (cut off 0.05) |      | ID No.     | E-value  | Protein families |
|---------------------------------|----------------------------------------|------|------------|----------|------------------|
|                                 | start                                  | end  |            |          |                  |
| GL50803_23492                   | 597                                    | 619  | PF00023.23 | 1.00E-03 | Ank              |
| GL50803_23492                   | 658                                    | 681  | PF00023.23 | 3.10E-05 | Ank              |
| GL50803_23492                   | 690                                    | 709  | PF00023.23 | 4.70E-02 | Ank              |
| GL50803_28379                   | 109                                    | 392  | PF00664.16 | 2.70E-10 | ABC_membrane     |
| GL50803_28379                   | 677                                    | 773  | PF00005.20 | 2.40E-11 | ABC_tran         |
| GL50803_28379                   | 900                                    | 1146 | PF00664.16 | 4.00E-18 | ABC_membrane     |
| GL50803_28379                   | 1251                                   | 1282 | PF08477.6  | 6.60E-03 | Miro             |
| GL50803_28379                   | 1301                                   | 1417 | PF00005.20 | 1.30E-12 | ABC_tran         |
| GL50803_28379                   | 1438                                   | 1475 | PB011559   | 1.50E-05 | Pfam-B_11559     |
| GL50803_28962                   | 74                                     | 184  | PF02430.8  | 1.70E-03 | AMA-1            |
| GL50803_28962                   | 99                                     | 179  | PF02009.9  | 1.10E-02 | Rifin_STEVOR     |
| GL50803_28962                   | 105                                    | 193  | PF12259.1  | 2.90E-04 | DUF3609          |
| GL50803_28962                   | 122                                    | 193  | PF08374.4  | 7.10E-03 | Protocadherin    |
| GL50803_28962                   | 127                                    | 184  | PF06024.5  | 1.90E-04 | DUF912           |
| GL50803_28962                   | 139                                    | 188  | PF05510.6  | 4.30E-02 | Sarcoglycan_2    |
| GL50803_28962                   | 139                                    | 199  | PB006006   | 4.50E-04 | Pfam-B_6006      |
| GL50803_28962                   | 141                                    | 222  | PF02480.9  | 1.80E-06 | Herpes_gE        |
| GL50803_28962                   | 141                                    | 181  | PF05454.4  | 5.00E-02 | DAG1             |
| GL50803_28962                   | 143                                    | 183  | PF06583.5  | 9.90E-05 | Neogenin_C       |
| GL50803_28962                   | 145                                    | 197  | PF04478.5  | 3.00E-03 | Mid2             |
| GL50803_28962                   | 146                                    | 193  | PB011119   | 8.30E-06 | Pfam-B_11119     |
| GL50803_28962                   | 147                                    | 198  | PF07423.4  | 3.60E-02 | DUF1510          |
| GL50803_28962                   | 148                                    | 232  | PB019284   | 3.00E-04 | Pfam-B_19284     |
| GL50803_28962                   | 154                                    | 206  | PF00335.13 | 1.10E-02 | Tetraspannin     |
| GL50803_28962                   | 154                                    | 231  | PF03748.7  | 4.90E-02 | FilL             |
| GL50803_28962                   | 155                                    | 190  | PF05961.4  | 2.00E-02 | Chordopox_A13L   |
| GL50803_32999                   | 2                                      | 74   | PF06009.5  | 4.70E-02 | Laminin_II       |
| GL50803_32999                   | 2                                      | 36   | PF12329.1  | 4.90E-02 | TMF_DNA_bd       |
| GL50803_32999                   | 10                                     | 245  | PF00038.14 | 9.60E-03 | Filament         |
| GL50803_32999                   | 14                                     | 173  | PF05701.4  | 3.30E-04 | DUF827           |
| GL50803_32999                   | 50                                     | 153  | PF03962.8  | 7.20E-03 | Mnd1             |
| GL50803_32999                   | 84                                     | 127  | PF04977.8  | 3.20E-02 | DivIC            |
| GL50803_32999                   | 91                                     | 173  | PB000039   | 5.40E-05 | Pfam-B_39        |
| GL50803_32999                   | 97                                     | 250  | PB016660   | 5.10E-04 | Pfam-B_16660     |
| GL50803_32999                   | 122                                    | 174  | PF11559.1  | 3.80E-02 | ADIP             |
| GL50803_32999                   | 261                                    | 382  | PF04156.7  | 8.30E-04 | IncA             |
| GL50803_32999                   | 269                                    | 396  | PF10174.2  | 1.20E-02 | Cast             |
| GL50803_32999                   | 279                                    | 344  | PB000381   | 4.70E-04 | Pfam-B_381       |
| GL50803_32999                   | 298                                    | 349  | PF06156.6  | 4.00E-02 | DUF972           |
| GL50803_32999                   | 302                                    | 363  | PF12329.1  | 6.10E-04 | TMF_DNA_bd       |
| GL50803_42285                   | 679                                    | 969  | PB003450   | 2.50E-22 | Pfam-B_3450      |
| GL50803_42285                   | 2594                                   | 2895 | PF08393.6  | 3.90E-38 | DHC_N2           |
| GL50803_42285                   | 3265                                   | 3336 | PF07728.7  | 1.60E-03 | AAA_5            |
| GL50803_5649                    | 51                                     | 99   | PF00191.13 | 3.30E-04 | Annexin          |
| GL50803_5649                    | 111                                    | 162  | PF00191.13 | 2.60E-02 | Annexin          |
| GL50803_5649                    | 189                                    | 240  | PF00191.13 | 5.50E-03 | Annexin          |
| GL50803_6733                    | 129                                    | 177  | PF01529.13 | 2.50E-20 | zf-DHHC          |
| GL50803_7110                    | 11                                     | 79   | PF00240.16 | 3.50E-34 | ubiquitin        |
| GL50803_7110                    | 16                                     | 71   | PB014891   | 7.30E-06 | Pfam-B_14891     |
| GL50803_7110                    | 31                                     | 75   | PB013282   | 3.10E-04 | Pfam-B_13282     |
| GL50803_7532                    | 9                                      | 159  | PB010324   | 0,00     | Pfam-B_10324     |
| GL50803_7532                    | 12                                     | 74   | PF02874.16 | 1.30E-09 | ATP-synt_ab_N    |
| GL50803_7532                    | 234                                    | 501  | PF00006.18 | 2.20E-96 | ATP-synt_ab      |
| GL50803_7532                    | 524                                    | 654  | PF00306.20 | 4.00E-13 | ATP-synt_ab_C    |
| GL50803_8559                    | 18                                     | 80   | PF00137.14 | 6.00E-13 | ATP-synt_C       |
| GL50803_8559                    | 97                                     | 162  | PF00137.14 | 1.50E-20 | ATP-synt_C       |
| GL50803_8564                    | 642                                    | 699  | PF10211.2  | 3.40E-03 | Ax_dynein_light  |
| GL50803_8589                    | 53                                     | 336  | PF02383.11 | 6.20E-44 | Syja_N           |
| GL50803_8903                    | 50                                     | 189  | PF07002.9  | 1.20E-32 | Copine           |

| GiardiaDB r1.1<br>accession No. | PFAM A+B identification (cut off 0.05) |      | ID No.     | E-value   | Protein families |
|---------------------------------|----------------------------------------|------|------------|-----------|------------------|
|                                 | start                                  | end  |            |           |                  |
| GL50803_93736                   | 127                                    | 201  | PB001786   | 3.70E-10  | Pfam-B_1786      |
| GL50803_93736                   | 201                                    | 621  | PB001786   | 1.90E-116 | Pfam-B_1786      |
| GL50803_93736                   | 1252                                   | 1392 | PF08393.6  | 3.10E-02  | DHC_N2           |
| GL50803_93736                   | 1485                                   | 1615 | PF08393.6  | 0,00      | DHC_N2           |
| GL50803_93736                   | 1865                                   | 1938 | PF07728.7  | 2.30E-03  | AAA_5            |
| GL50803_93736                   | 2185                                   | 2329 | PF07728.7  | 1.10E-07  | AAA_5            |
| GL50803_93736                   | 2360                                   | 2658 | PB000014   | 2.40E-27  | Pfam-B_14        |
| GL50803_93736                   | 2637                                   | 2871 | PB017424   | 7.50E-43  | Pfam-B_17424     |
| GL50803_93736                   | 3170                                   | 3360 | PB000014   | 1.00E-10  | Pfam-B_14        |
| GL50803_9503                    | 71                                     | 303  | PF00561.13 | 1.00E-11  | Abhydrolase_1    |
| GL50803_96670                   | 129                                    | 197  | PF00690.19 | 1.70E-19  | Cation_ATPase_N  |
| GL50803_96670                   | 222                                    | 454  | PF00122.13 | 6.40E-58  | E1-E2_ATPase     |
| GL50803_96670                   | 764                                    | 832  | PF00702.19 | 5.30E-10  | Hydrolase        |
| GL50803_96670                   | 915                                    | 980  | PF00702.19 | 5.90E-06  | Hydrolase        |
| GL50803_96670                   | 1049                                   | 1294 | PF00689.14 | 1.60E-47  | Cation_ATPase_C  |
| GL50803_9780                    | 9                                      | 89   | PF08400.3  | 2.20E-02  | phage_tail_N     |
| GL50803_88765                   | 6                                      | 615  | PF00012.13 | 3.70E-249 | HSP70            |
| GL50803_88765                   | 515                                    | 613  | PB002482   | 3.80E-07  | Pfam-B_2482      |
| GL50803_88765                   | 614                                    | 657  | PB008944   | 1.00E-05  | Pfam-B_8944      |
| GL50803_11654                   | 8                                      | 67   | PF00191.13 | 7.10E-09  | Annexin          |
| GL50803_11654                   | 159                                    | 206  | PF00191.13 | 4.40E-02  | Annexin          |
| GL50803_137618                  | 133                                    | 319  | PF03302.6  | 1.20E-09  | VSP              |
| GL50803_137618                  | 455                                    | 853  | PF03302.6  | 1.20E-130 | VSP              |
| GL50803_137618                  | 793                                    | 850  | PB016930   | 5.60E-05  | Pfam-B_16930     |
| GL50803_6430                    | 7                                      | 241  | PF00244.13 | 2.10E-104 | 14.3.2003        |
| GL50803_21411                   | 5                                      | 271  | PB002445   | 2.60E-18  | Pfam-B_2445      |
| GL50803_21411                   | 610                                    | 747  | PF00005.20 | 1.70E-15  | ABC_tran         |
| GL50803_21411                   | 1675                                   | 1733 | PB003932   | 4.60E-04  | Pfam-B_3932      |
| GL50803_21411                   | 1691                                   | 1818 | PF00005.20 | 7.70E-14  | ABC_tran         |
| GL50803_13000                   | 17                                     | 346  | PF01992.9  | 1.60E-32  | vATP-synt_AC39   |
| GL50803_29327                   | 18                                     | 170  | PF03357.14 | 8.40E-15  | Snf7             |
| GL50803_29327                   | 38                                     | 133  | PF01406.12 | 3.10E-02  | tRNA-synt_1e     |
| GL50803_14225                   | 53                                     | 246  | PB001790   | 3.40E-06  | Pfam-B_1790      |
| GL50803_6497                    | 27                                     | 79   | PF00753.20 | 6.60E-07  | Lactamase_B      |
| GL50803_7796                    | 18                                     | 67   | PF00191.13 | 5.20E-08  | Annexin          |
| GL50803_10311                   | 7                                      | 147  | PF02729.14 | 1.40E-41  | OTCace_N         |
| GL50803_10311                   | 159                                    | 319  | PF00185.17 | 2.30E-46  | OTCace           |
| GL50803_23833                   | 59                                     | 136  | PF03635.10 | 9.90E-08  | Vps35            |
| GL50803_23833                   | 169                                    | 349  | PF03635.10 | 6.10E-24  | Vps35            |
| GL50803_23833                   | 651                                    | 747  | PF03635.10 | 5.30E-04  | Vps35            |
